1 Comparative Genome Analysis Reveals Important Genetic Factors Associated with Probiotic  
2 Property in *Enterococcus faecium* strains

3

4 Running title: Comparative Genome of *Enterococcus faecium* strains

5

6 Vikas C. Ghattargi<sup>1,2</sup>, Meghana A. Gaikwad<sup>1</sup>, Bharati S. Meti<sup>2</sup>, Yogesh S. Nimonkar<sup>1</sup>, Kunal  
7 Dixit<sup>1</sup>, Om Prakash, Yogesh S. Shouche<sup>1</sup>, Shrikant S. Pawar<sup>1#</sup>, Dhiraj Dhotre<sup>1#</sup>

8

9 <sup>1</sup>National Centre for Microbial Resources (NCMR), National Centre for Cell Science  
10 (NCCS), Pune- 411021, Maharashtra, India

11

12 <sup>2</sup>Department of Biotechnology, Basaveshwar Engineering College, Bagalkot- 587102,  
13 Karnataka, India

14

15 # Corresponding Author(s)

16 Dr. Dhiraj Dhotre, National Centre for Microbial Resource (NCMR), National Centre for  
17 Cell Science (NCCS), Pune- 411021, Maharashtra, India. Email: [dhiraj@nccs.res.in](mailto:dhiraj@nccs.res.in)

18

19 Dr Shrikant S. Pawar, National Centre for Microbial Resource (NCMR), National Centre for  
20 Cell Science (NCCS), Pune- 411021, Maharashtra, India. Email: [shrikantpawar@nccs.res.in](mailto:shrikantpawar@nccs.res.in)

21

## 22 **ABSTRACT**

23 *Enterococcus faecium* though commensals in human gut, few strains provide beneficial effect  
24 to humans as probiotics, few are responsible for nosocomial infection and few as non-  
25 pathogens. Comparative genomics of *E. faecium* will help to reveal the genomic differences  
26 responsible for the said properties. In this study, we compared *E. faecium* strain 17OM39  
27 with a marketed probiotic, non-pathogenic non-probiotic (NPNP) and pathogenic strains. The  
28 core genome analysis revealed, 17OM39 was closely related with marketed probiotic strain  
29 T110. Strain 17OM39 was found to be devoid of known vancomycin, tetracycline resistance  
30 genes and functional virulence genes. Moreover, 17OM39 is ‘less open’ due to absence of  
31 frequently found transposable elements. Genes imparting beneficial functional properties  
32 were observed to be present in marketed probiotic T110 and 17OM39 strains. Additional,  
33 genes associated with colonization within gastrointestinal tract were detected across all the  
34 strains. Beyond shared genetic features; this study particularly identified genes that are  
35 responsible to impart probiotic, non-pathogenic and pathogenic features to the strains of *E.*  
36 *faecium*. The study also provides insights into the acquired and intrinsic drug resistance  
37 genes, which will be helpful for better understanding of the physiology of antibiotic  
38 resistance in *E. faecium* strains. In addition, we could identify genes contributing to the  
39 intrinsic ability of 17OM39 *E. faecium* isolate to be a potential probiotic.

40 The study has comprehensively characterized genome sequence of each strain to find the  
41 genetic variation and understand effects of these on functionality, phenotypic complexity.  
42 Further the evolutionary relationship of species along with adaptation strategies have been  
43 including in this study.

44 **Keywords:** non-pathogenic, pathogenic, Indian, comparative genome analysis, *In-silico*  
45 analysis

## 46 **BACKGROUND**

47 The genus *Enterococcus* is one of the diverse and ecologically significant group and  
48 members of this genus are ubiquitously distributed in nature viz. animals, human  
49 gastrointestinal tract (GIT) and plants (Lam et al. 2012; Qin et al. 2012; Geldart and  
50 Kaznessis 2017; McKenney et al. 2016; dos Santos et al. 2015; Byappanahalli et al. 2012;  
51 Rasouli Pirouzian et al. 2012). *Enterococcus* plays an important role in the ripening of cheese  
52 products by lipolysis and proteolytic properties leading to the development of aroma and  
53 flavour (Rasouli Pirouzian et al. 2012). In Mediterranean region, *Enterococcus* spp have been  
54 used in the preparation of various meat and fermented milk products for centuries (dos Santos  
55 et al. 2015). Further, they also exhibit the beneficial property of bacteriocin production  
56 (Rasouli Pirouzian et al. 2012; dos Santos et al. 2015) presenting activity against potential  
57 pathogens viz. group D streptococci and *Listeria* in various foods and in GIT (Rasouli  
58 Pirouzian et al. 2012).

59 *E. faecium* is widely and extensively studied for its leading cause of nosocomial infections in  
60 humans (Guggenbichler et al. 2011). It is a gut commensal and acts as opportunistic pathogen  
61 due to a variety of virulence factors, including lipopolysaccharides and biofilm formation  
62 (Natarajan and Parani 2015). Their pathogenic nature is evident in urinary tract infections,  
63 endocarditis, and surgical wound infection, displaying its capability of causing a wide range  
64 of infections (Kajihara et al. 2015). Another remarkable character of *E. faecium* is its  
65 tolerance to many antimicrobial drugs (Coque et al. 2005; O'Driscoll and Crank 2015). It has  
66 also acquired antibiotic-resistance gene against vancomycin and a multidrug resistance beta-  
67 lactamase gene (Miller et al. 2014). Besides, it has been shown that *E. faecium* is capable to  
68 acquire resistance to antibiotics by sporadic mutations and infections caused by these are  
69 normally difficult to treat (Hollenbeck and Rice 2012). The strains like Aus0004 and V583  
70 are reported as pathogens (Lam et al. 2012).

71 Numerous studies in the last decade have validated the safety claim of *Enterococci* in foods  
72 and as probiotics (Huys et al. 2013; Araújo and Ferreira 2013; Giraffa 2002; Franz et al.  
73 2003). The application of *Enterococci* as a starter culture e.g *Enterococcus faecium* SF68  
74 (Switzerland) and as probiotic e.g *E. faecium* T110 (Japan) has been used widely (Benyacoub  
75 et al. 2005; Jong-Hoon Lee, Donghun Shin, Bitnara Lee, Hyundong Lee, Inhyung Lee 2017).  
76 Additionally, *E. faecium* T110 is a content of many commercial available probiotics and no  
77 cause of illness or death has been reported (Natarajan and Parani 2015). *E. faecium* is among  
78 one of the directly fed microorganism recognized by the Association of American Feed  
79 Control, 2016. It is permitted as probiotic supplement in the diet for poultry, dogs, piglets and  
80 mice (Kačániová et al. 2006; Kreuzer et al. 2012; Vahjen and Männer 2003; Benyacoub et al.  
81 2005). Few strains of *E. faecium* (NRRL B-2354) act as surrogate microorganism used in  
82 place of pathogens for validation of thermal processing technologies (Kopit et al. 2014) and  
83 some are widely used as laboratory strains e.g. *E. faecium* 64/3 (Bender et al. 2015). These  
84 two strains are non-pathogenic and are used routinely without any known disease outbreak  
85 (VanRenterghem 2012).

86 Thus the diversity and plasticity of *E. faecium* are accountable for both probiotic and  
87 pathogenic nature (Abeijón et al. 2006; Hassanzadazar et al. 2014; Satish Kumar et al. 2011).  
88 The work described here elucidates the genetic divergence between strain 17OM39 with  
89 marketed probiotic, non-pathogenic, and pathogenic strains to identify the genes reported for  
90 pathogenicity, antibiotic resistance, and probiotic properties. An attempt has also been made  
91 to identify the genes present exclusively in probiotic strains.

## 92 **RESULTS AND DISCUSSION**

### 93 *Strain selection*

94 Whole genome sequences were downloaded from NCBI genome database and the strains  
95 were grouped into probiotic, non-pathogenic non-probiotic (NPNP) and pathogenic based on

96 the literature survey (Table1). The pathogenic group had six strains: DO, Aus0004, Aus0085,  
97 6E6, E39 and ATCC 700221(Lam et al. 2012; Qin et al. 2012; Geldart and Kaznessis 2017;  
98 McKenney et al. 2016). The first four were isolated from human blood and latter two from  
99 human stool. The non-pathogenic group had two strains: NRRL B-2354 and 64/3(Kopit et al.  
100 2014; Bender et al. 2015). The probiotic group had the marketed strain T110 (Natarajan and  
101 Parani 2015) and strain 17OM39 that was isolated from healthy human gut (Ghattargi et al.  
102 2018).

### 103 ***General genomic features***

104 Genome sizes ranged from approximately 2.57–2.99 Mb with strain DO exhibiting the  
105 smallest and 6E6 the largest genome. Average GC content varied between  $37.90 \pm 0.65\%$  and  
106 the strains with high G+C% do not have higher CDS, this contradicts with the results stated  
107 earlier (Bonacina et al. 2017). The genomic features of the strains under study are provided in  
108 Table 1. No significant differences ( $P \leq 0.05$ , Kruskal–Wallis statistical test) could be noted  
109 between the groups with respect to their genome size, GC content, average number of genes  
110 and coding DNA sequence (CDS).

111 The RAST annotation has facilitated to determine the features, assigned to subsystems that  
112 are present in all organisms (Figure S1). The average number of annotated protein-encoding  
113 genes for the probiotic group was 2,570; for NPNP group was 2,639 and 3,093 for the  
114 pathogenic group. Annotation based on RAST for the strains under study suggests an  
115 abundance of carbohydrates and protein metabolism subsystems. The enriched carbohydrates  
116 metabolism is in agreement with the *E. faecium* ability to utilize a wide range of mono-, di-,  
117 oligo-saccharides (Devriese et al. 1987; Manero and Blanch 1999).

118

119

## 120 *Comparisons of 17OM39 with other E. faecium strains*

121 The availability of complete *E. faecium* genomes has helped to define core, accessory and  
122 unique genomic features for all the strains. The comparison of strain 17OM39 with other  
123 strains of probiotic, NPNP and pathogenic strains, revealed 1935 (85.53 %) core genes, 526  
124 (20.64%) accessory and 87(3.41%) unique genes. The numbers of shared genes are plotted as  
125 the function of number of strains (Figure 1). The figure shows that pan-genome size grew  
126 continuously with the addition of strains indicating an open pan-genome and the results are in  
127 accordance with previous study for *E. faecium* genome (Mikalsen et al. 2015). In contrast to  
128 the pan-genome, the size of the core-genome gradually stabilized (Mikalsen et al. 2015).

## 129 *Pan-Genome Analysis*

130 The pan genome analysis revealed the presence of 1935 core genes and 5718 accessory genes  
131 (Figure 2). The number of strain-specific genes observed was 67, 87, 10, 64, 62, 16, 13, 36,  
132 54 and 14 for strains 17OM39, T110, NRRL B-2354, 64/3, DO, AUS0004, AUS0085, 6E6,  
133 E39 and ATCC700221, respectively (Figure 2). Identification of core, accessory and unique  
134 gene families by orthoMCL analysis revealed the proportion of known, hypothetical and  
135 uncharacterized proteins in these groups (Figure S2A). A large percentage (61.19%) of  
136 unique genes was assigned to an uncharacterized group and further studies are required to  
137 examine these unexplored attributes.

138 orthoMCL analysis of **core genes** led to the identification of 850 genes present in single copy  
139 and 772 genes present in multiple copies across all ten strains. Functional analysis of the core  
140 genes showed distribution in a varied range of functional categories within Cluster of  
141 Orthologous Genes (COG) viz. growth, DNA replication, transcription, translation,  
142 carbohydrate and amino acid metabolism, stress response and transporters. In contrast to  
143 earlier reports, core genes were also found in the functional categories of secondary  
144 metabolism and motility (Palmer et al. 2012; Beukers et al. 2017). Categories representing

145 transport and metabolism of coenzyme, lipid, amino acid, nucleotide comprised of 16.24% of  
146 the core genes, while 11.30% of core genes were ascribed to carbohydrate metabolism which  
147 is in agreement with an earlier report (Beukers et al. 2017).

148 Functional analysis of the **accessory genes** showed diverse distribution in COG categories as  
149 similar to core gene annotations (Figure S3). An important observation was seen in  
150 subsystems a) carbohydrate metabolism and b) replication, recombination and repair systems.  
151 The former was abundant in the probiotic group ( $p = 0.002$ ) while latter in the pathogenic  
152 group ( $p = 0.039$ ) (Figure 3). This has been attributed to the properties of probiotic strains to  
153 utilize various carbohydrates(Ghattargi et al. 2018); while the pathogenic group had higher  
154 abundance of replication and recombination genes known to be associated with a large  
155 number of mobile elements(Lam et al. 2012; Qin et al. 2012). We also made an attempt to  
156 find the accessory genes being shared between the groups. The probiotic and pathogenic  
157 group shared 15 genes; four of them are general transporters, two are manganese-containing  
158 catalase gene, which provides resistance to hydrogen peroxide present in human GIT (Figure  
159 S2B) (Wang et al. 2014; King et al. 2000; Xu et al. 2016).

160 The important **unique genes** associated with the various strains are as follows:  
161 phosphotransferase (PTS) system for mannose/fructose/sorbose in probiotic strain 17OM39 is  
162 involved in sugar uptake (Postma et al. 1993; Monot et al. 2011). Marketed probiotic strain  
163 T110 has macrolide-efflux transmembrane protein which acts as drug efflux pump and plays  
164 a key role in drug resistance (Sangvik et al. 2005; Stadler and Teuber 2002). The important  
165 unique genes for others are hexosyltransferase in strain 64/3, type III restriction-modification  
166 system in strain NRRL B- 2354, Cro/CI family transcriptional regulator protein in strain 6E6,  
167 transposase for insertion sequence IS1661 in strain ATCC 700221, streptogramin A  
168 acetyltransferase in strain Aus0004, Patatin-like proteins in strain Aus0085, IS1668

169 transposase in strain DO, plasmid recombination enzyme in strain E39. An additional file  
170 gives the detailed information on core, accessory and unique genes in more detail [see  
171 Additional file 1, 2, 3].

172 Thus, the analysis conducted here has shown that pan-genome of *E. faecium* constructed on  
173 the basis of 10 genomes is still open, while the core genome seems to have reached almost a  
174 closed state. The small size of the core genome and a huge number of accessory genes  
175 support the observation of the genomic fluidity of *E. faecium* (Bakshi et al. 2016).

### 176 ***Antibiotic resistance determinants***

177 *Enterococci* can exhibit resistance to a number of antibiotics, which has been attributed to  
178 their innate resistance and also due to their ability to successfully acquire resistance through  
179 horizontal gene transfer (HGT) (Tong et al. 2017; Hegstad et al. 2010a). Multiple-drug-  
180 resistant strains of *E. faecium* have been increasingly associated with nosocomial infections  
181 particularly the vancomycin resistance (McArthur et al. 2013). Thus screening of antibiotic  
182 resistance determinants in genomes was necessary in order to understand if probiotic strains  
183 harboured these genes.

184 Here we screened the genomes for antibiotic resistance genes using Comprehensive  
185 Antibiotic Resistance Database (CARD) (McArthur et al. 2013). Genes conferring resistance  
186 to kanamycin were found in all the genomes which have been attributed to the intrinsic  
187 property within *E. faecium* (Galimand et al. 2011). The non-pathogenic group showed the  
188 presence of general multidrug transporter. Within pathogenic strains, Aus004 and Aus0085  
189 showed the presence of tetracycline, trimethoprim and vancomycin resistance gene. Strains  
190 E39 and 6E6 showed the presence of genes responsible for trimethoprim and tetracycline  
191 resistance. Pathogenic strain E39 presented daptomycin resistance gene and strain ATCC  
192 700221 showed the presence of genes responsible for resistance to the antimicrobial activity



193 of cationic antimicrobial peptides and antibiotics such as polymyxin. Table 2 shows various  
194 antibiotic resistance genes found in each strain.

195 In our study, genes imparting resistance to one or more antibiotics were seen in different  
196 strains of *E. faecium*. Overall, the pathogenic group of *E. faecium* was found to have a higher  
197 prevalence of antibiotic resistance genes; a factor that contributes to the challenge of  
198 selecting therapeutic measures. The probiotic group was devoid of any major clinically  
199 relevant antibiotic resistance (Natarajan and Parani 2015; Ghattargi et al. 2018).

### 200 ***Virulence determinants***

201 Virulence genes contribute to the pathogenicity of an organism (Comerlato et al. 2013).  
202 Despite the increasing knowledge of *E. faecium* as an opportunistic pathogen, the distribution  
203 of virulence factors is still poorly understood (Comerlato et al. 2013). Knowledge of the  
204 virulence characteristics helps to understand the complex pathogenic process of the  
205 pathogenic strains. This study also determines genes responsible for virulence factors such as  
206 adherence, biofilm formation and exo-enzyme production in probiotic, NPNP and pathogenic  
207 groups.

208 The ability to adhere to the GIT is reflected to be one of the main selection criteria for  
209 potential probiotics as it extends their persistence in the intestine (Ouweland et al. 1999) and  
210 thus allows the bacterium to exert its probiotic effects for an extended time. However,  
211 adhesion is also considered a potential virulence factor for pathogenic bacteria (Kirjavainen  
212 et al. 2001). The intestinal mucus is an important site for bacterial adhesion and colonization  
213 (Finlay 1997) and thus adherence property is beneficial to humans in case of probiotics and it  
214 possesses adverse effects in pathogenic strains. The genes described as adherence factors  
215 (*acm*, *scm*, *EbpA*, *EbpC*) have been attributed to pathogenic effects and our study could find  
216 most of these genes in the pathogenic group. Excluding strain DO all other pathogenic strains

217 showed the presence of enterococcus surface protein (*esp*) gene which contributes as a major  
218 virulence factor (Heikens et al. 2007; Ramadhan and Hegedus 2005; Toledo-Arana et al.  
219 2001; Baldassarri et al. 2001).

220 The *bopD* gene involved in biofilm was intact in all groups but the operon was absent in  
221 strain 17OM39, marketed probiotic strain T110 (Ghattargi et al. 2018) and non-pathogenic  
222 strains (Natarajan and Parani 2015). In an exo-enzyme group, hyaluronidase gene was found  
223 to be associated with marketed probiotic strain alone, while the gene in strain 17OM39  
224 displayed an alteration in sequence at position 167 (G>T) suggesting this could affect its  
225 functionality due to the nonsense mutation. Gene *acm* in the probiotic and the non-pathogenic  
226 group was not functional due to the non-sense mutation at position 1060 (G>T). Also, the  
227 virulence gene *scm*, *efaA* and *srtC* are not well characterized as virulence determinants in *E.*  
228 *faecium* (Natarajan and Parani 2015) (Table 3).

229 Although one could expect a virulence trait depending on the source of isolation, our study  
230 did not find any such traits and differs from the earlier reports (Dahlén et al. 2012). Also, the  
231 strains showed significantly different patterns of virulence determinants, which underlines the  
232 findings of other author (Dahlén et al. 2012). The strain 17OM39 within the probiotic group  
233 was devoid of any clinically relevant functional virulence determinants.

### 234 ***Mobile genetic elements***

235 Mobile genetic elements (MGEs) play an important role in HGT of genes within and between  
236 bacteria (Beukers et al. 2017; Jiang et al. 2017; Kaplan 2014; Von Wintersdorff et al. 2016).  
237 A number of MGEs have been described in *E. faecium* including transposons, plasmids, and  
238 bacteriophage (Hegstad et al. 2010b; Beukers et al. 2017).

239 **Insertion sequences (ISs)** are possibly the smallest and most independent transposable  
240 elements, thus playing an important role in shaping the bacterial genomes (Siguiet et al.

241 2014). Based on the screening for IS elements (Table S1), the IS1542 was present only in  
242 probiotic strains and earlier studies on IS1542 have shown its presence in just 2 out of 65  
243 human pathogenic strains, suggesting no direct relation with the strains pathogenicity (Huh et  
244 al. 2004). The IS element ISEfa12 was present only in non-pathogenic group and IS1216,  
245 IS1216E, IS1216V, IS16, IS6770, ISEf1, ISEfa10, ISEfa11, ISEfa5, ISEfa7, ISEfa8,  
246 ISEnfa3, ISS1W were present only in all the strains of the pathogenic group. The presence of  
247 insertion sequence families in all groups imply these elements are spread by HGT (Mikalsen  
248 et al. 2015). However, particular IS elements are distributed in only one group suggesting that  
249 these IS elements have evolved over the time (Werner et al. 2011; Mikalsen et al. 2015).  
250 Notably, presence of IS16 has been used as a marker within the hospital strains of *E. faecium*  
251 with 98% sensitivity and 100% specificity (Mikalsen et al. 2015). This observation was  
252 further supported by detecting IS16 in the only pathogenic group of *E. faecium* strains.  
253 Moreover, ISEfa11 and ISEfa5 are associated with vancomycin resistance genes viz. *VanS*,  
254 *VanX*, and *VanY* [34,65]. This correlation was also seen in this study (Figure 4).

255 *E. faecium* are known to harbour bacteriophages, so the presence of **prophage** was predicated  
256 in all the ten genomes [34, 66]. Bacteriophages contribute actively to bacterial evolution by  
257 integrating and excising from the genome (Matos et al. 2013). In certain conditions they  
258 provide new genetic properties to the bacterial host and leading to the development of new  
259 pathogens within species, as shown for *Escherichia coli*, *Vibrio cholera* and  
260 *Corynebacterium diphtheriae* (Davis and Waldor 2003; Backman et al. 1983; FREEMAN  
261 1951). We could trace at-least one intact prophage in all the ten genomes (Table S2). In total,  
262 there were three incomplete (PHASTER score < 70), twenty-three intact phages (PHASTER  
263 score < 70-90) and nine phages whose completeness status was doubtful (PHASTER score <  
264 90). The non-pathogenic strains had two intact prophages, while the probiotic strain 17OM39  
265 had one intact and a doubtful prophage while the other strain T110 had two intact prophages.

266 *Enterococcus faecium* ATCC 700221 had the highest number of intact phages. We could not  
267 find any known functional virulence factors or genes associated with important functions  
268 within these bacteriophages regions. Further, Clustered Regularly Interspaced Short  
269 Palindromic Repeat (CRISPR) associated (Cas) system were found to be absent within the  
270 genomes as opposite to the closed neighbour, *E. faecalis* (Palmer and Gilmore 2010).

271 **Genomic Islands** are distinct DNA fragments differing between closely related strains,  
272 which usually are associated with mobility (Dobrindt et al. 2004; Juhas et al. 2009). Genomic  
273 island comparison between strain 17OM39 with the other strain of *E. faecium* was done to  
274 find out the genes transferred by HGT (Table S3). We identified a total of 11 genomic island  
275 in strain 17OM39 amounting to 3.5% of total genome. The genomic island (GI1) was  
276 common across all groups except for strain 6E6. The choloylglycine hydrolase gene was  
277 found to be present in the genomic island of probiotic stain T110, pathogenic strain 6E6 and  
278 non-pathogenic strain 64/3. The choloylglycine hydrolase gene imparts resistance to bile salts  
279 and thus helps to survive within the gut environment (Jones et al. 2008; Begley et al. 2006).  
280 In this study, the pathogenic group showed a large number of IS elements, transposons and  
281 antibiotic resistance genes within the genomic island. Pathogenic strains Aus0004 and  
282 Aus0085 showed the presence of virulence factor *esp* gene (enterococcal surface protein) and  
283 vancomycin resistance genes and only pathogenic strains alone showed the presence of  
284 tetracycline resistance gene within the genomic island. They also showed presence of a cell  
285 adhesion protein within the Genomic Island. A higher similarity was observed between  
286 genomic islands of probiotic and NPNP strains as compared to pathogenic group (Figure 5).  
287 The distribution of these MGE's within the genome is as shown in Figure 6 with strain  
288 AUS0004 having nearly 25% of its genome as mobile.

289 *E. faecium* behaves as probiotic, non-pathogenic and pathogenic these underlying  
290 mechanisms may be intrinsic to the strain or acquired by horizontal exchange of genetic

291 material. Thus genes associated with Genomic Islands can be considered as acquired  
292 properties (Juhas et al. 2009; Hollenbeck and Rice 2012; Dobrindt et al. 2004; Gold 2001;  
293 Marothi et al. 2005). Genes associated with probiotic properties in strain 17OM39 were  
294 found to be associated with the genome and not within any Genome islands. From this study,  
295 it is evident that the role of the MGEs in adding new capacities and also driving the  
296 evolution of the strains (Jones et al. 2008; Begley et al. 2006). Certainly, studies like one  
297 carried out here are helpful to understand the evolution of predominant strains. An additional  
298 file gives the detailed information on genes present in Genomic Islands in more detail [see  
299 Additional file 4].

### 300 ***Survival in Gastrointestinal Tract***

301 Biologically active microorganisms are usually required at the target site to induce a health  
302 benefit or pathogenic effect, but must survive the host's natural barriers such as the acid, bile  
303 and must adhere to GIT (İspirli et al. 2015; Banwo et al. 2013; Ahmadova et al. 2013; Rao et  
304 al. 2013). Moreover, *E. faecium* is a part of the core microbiome and their number in human  
305 faeces ranges from  $10^4$  to  $10^5$  per gram (Santagati et al. 2012). Thus a list of genes encoding  
306 for survival and growth were observed in the strain 17OM39 and compared with other  
307 genomes. We found Permease IIC component gene responsible for catalysing the  
308 phosphorylation of incoming sugar substrates (Minelli and Benini 2008) only in the probiotic  
309 group. All the groups showed the presence of the genes that impart resistance to acid, bile and  
310 can hydrolyze bile salt. Moreover, these strains were also able to adhere and grow in the GI  
311 conditions. This finding correlates with the fact that *Enterococcus faecium* are normal  
312 inhabitants of the gut (Campos et al. 2004) (Table 4).

313

314 ***Probiotic properties***

315 Numerous characteristics should be taken into account when selecting a probiotic strain.  
316 Some examples of desirable characteristics for a probiotic strain include the ability to survive  
317 and retain viability in acid and bile concentrations, simulating the harsh environment of GIT  
318 (Charteris et al. 1998; Rehaiem et al. 2014). A probiotic strain should have the ability for  
319 producing antimicrobial substances but be devoid of acquired antibiotic resistance genes  
320 (Charteris et al. 1998; Rehaiem et al. 2014; Fao et al. 2002; Ganguly et al. 2011). As stated  
321 earlier the strain 17OM39 and marketed probiotic strains T110 were devoid of any clinically  
322 relevant antibiotic resistance gene while all the strains were able to survive in GIT conditions.  
323 For strains 17OM39 and T110 (marketed probiotic) we could trace complete pathways for  
324 amino acid synthesis viz. valine, lysine, and methionine (Table 5). These are among the  
325 essential amino acids and need to be supplied exogenously (Food and Nutrition Board 1989).  
326 Vitamins such as folate and thiamine are the components of Vitamin-B and are considered as  
327 essential nutrients for humans. Folate (folic acid) cannot be synthesized by human cells and  
328 hence is necessary to be supplemented exogenously as it plays important role in DNA and  
329 RNA synthesis and amino acid metabolism (Mahmood 2014; Ohrvik and Witthoft 2011;  
330 Tuszyńska 2012). Thus, strains (T110 and 17OM39) producing such amino acids and  
331 vitamins are considered beneficial for human use (Fijan 2014; Eck and Friel 2013). Genes  
332 responsible for antibacterial activity (bacteriocin) specific against *Listeria* were found. Genes  
333 for exopolysaccharide (EPS) and anti-oxidant (hydro-peroxidases) production were noted  
334 which in-turn help the probiotic strains in establishing themselves in the gut. The non-  
335 pathogenic group only had EPS gene cluster. Complete pathways for amino acid and vitamin  
336 synthesis were absent in NPNP and pathogenic group. Thus certain strains contribute  
337 beneficially to health as observed by the probiotic group strains.

338

### 339 ***Plasmids***

340 Earlier studies within *E. faecium* isolates have shown the abundance of plasmids by finding  
341 1-7 number of plasmids in 88 out of 93 isolates (Rosvoll et al. 2010). Plasmids comprise a  
342 substantial portion of the accessory genome and are accountable for much of antibiotic and  
343 virulence traits to be acquired by the HGT (Rosvoll et al. 2010). Thus an attempt was made to  
344 compare the plasmids of the strains considered in this study with respect to their virulence  
345 factors, antibiotic resistance, phage regions and IS elements.

346 Of all the strains taken for this study, we could find a gene with 66% similar to the cytolysin  
347 (*cyl*) gene in probiotic strain T110. Studies with the *cyl* gene have been an important  
348 determinant in lethality of endocarditis (Rosvoll et al. 2010). The CARD analysis of the  
349 plasmids shows the resistance to antibiotics viz vancomycin, streptothricin, erythromycin,  
350 gentamicin and kanamycin by pathogenic group stains: 6E6, ATCC700221, Aus0085, and  
351 E39 only (Table S4). No phage elements were associated with the probiotic strain T110,  
352 while the non-pathogenic strain (NRRL B-2354) and pathogenic strains (ATCC 700221,  
353 Aus0085, DO, and E39) harboured incomplete or complete prophage. The list of IS elements  
354 found in the plasmids of strains is summarised in the TableS5.

### 355 ***Delineating Probiotic, Non-pathogenic and Pathogenic strains***

356 Multi-Locus Sequence Analysis (MLSA) based phylogeny could not distinguish between  
357 pathogenic and non-pathogenic strains of *E. faecium* (Homan et al. 2002), but this could be  
358 achieved on the basis of the core genome SNP based phylogeny (Sankarasubramanian et al.  
359 2016; Heydari et al. 2013; Chen et al. 2013; Vliet and Kusters 2015). Thus, concatenated  
360 1935 core genes were used to construct a phylogenetic tree of the 10 strains along with  
361 *Enterococcus faecalis* symbioflor as an out-group. Phylogenetic reconstruction by using  
362 Maximum likelihood method separated 10 strains in 3 distinct clusters as the three groups

363 considered (bootstrap >90) (Figure 7). We found no clustering based on the source of  
364 isolation, while strain 17OM39 was closely related to the probiotic strain T110. The same  
365 observation was made when repeated with the pan-genome (data not shown).

366 PCA plot was generated using Euclidean distances based on the prevalence of genes in  
367 antimicrobial resistance, survival in GIT and probiotic properties. The PCA plot representing  
368 the differences in property harboured between the groups is as shown in Figure 8. The  
369 BLAST Atlas was generated with the help of GVVIEW server with strain Aus0004 as the  
370 reference genome (Figure 9). Of the strains, Aus0085 exhibited the highest relatedness to the  
371 reference strain. There were variable regions identified among non-pathogenic, pathogenic  
372 and probiotic group illustrating their dissimilarity in genome content. Pathogenic Island  
373 (2812458-2878042 and 1860143-1894650 bp) consist of majorly virulence-associated genes,  
374 IS elements transposes and integrase and antibiotic resistance-related genes. It also has  
375 vancomycin resistance gene cluster and presence of *esp* gene which correlates with the  
376 previous studies (Shankar et al. 2002; McBride et al. 2009). However, several phages and  
377 transposon-related loci from the reference strain appeared to be absent in marketed probiotic  
378 T110 and 17OM39 strains. This observation further supports their distinct segregation into  
379 independent clades.

## 380 CONCLUSIONS

381 This study has provided a valuable insight into genome-based investigations and has refined  
382 our knowledge on the genomic diversity of probiotic, non-pathogenic and pathogenic strains  
383 of *E. faecium*. The analysis has helped us to define core and accessory genome and also to  
384 understand the genomic relationships within them. The genomic features responsible for  
385 survival in GI tract, antibiotic resistance, virulence factors were known. We also have  
386 highlighted an abundance of mobile elements including prophage, insertion sequence



387 elements, genomic islands, and plasmids. Moreover, the analysis of intrinsic and acquired  
388 properties helped us to know the inherent probiotic properties of strain 17OM39.

389

## 390 **MATERIAL AND METHODS**

### 391 *Bacterial sequences and strains*

392 Whole Genome Sequence of *E. faecium* was retrieved from NCBI genomes and a total of ten  
393 strains were used in this study. All the genomes were RAST annotated (Overbeek et al.  
394 2014).

### 395 *Comparative analysis*

396 Comparative analysis of ten whole genome sequences of *Enterococcus faecium* was done by  
397 an ultra-fast bacterial pan-genome analysis pipeline (BPGA) (Chaudhari et al. 2016) which  
398 performs GC content analysis, pan-genome profile analysis along with sequence extraction  
399 and phylogenetic analysis. Furthermore, the genome was investigated for the presence of  
400 putative virulence genes using Virulence Factor of Bacterial Pathogens Database  
401 (VFDB)(Chen et al. 2005). Screening of probiotic genes was done by performing BLAST of  
402 probiotic genes to the genome by online NCBI's BLASTX tool (Altschul et al. 1990).  
403 Comprehensive Antibiotic resistance Database (CARD) was used for analysis of antibiotic  
404 resistance (McArthur et al. 2013). Presence of CRISPR repeats was predicted using the  
405 CRISPRFinder tools (Grissa et al. 2008). PHASTER: a rapid identification and annotation of  
406 prophage sequences within bacterial genomes were used for identification of prophages  
407 within the genome (Arndt et al. 2016). Bacterial insertion elements (ISs) were identified by  
408 ISfinder (Siguier et al. 2006). Horizontal gene transfer was detected by genomic island tool:  
409 Islandviewer (Langille and Brinkman 2009; Dhillon et al. 2015). The clustering and  
410 annotation of protein sequences were done with the help of orthoMCL (Li et al. 2003). COG  
411 analysis was done with the help of webMGA server (Wu et al. 2011). STAMP software was

412 used to generate PCA plot (Parks et al. 2014). A blast atlas was generated with the help of  
413 GVIEW Server (<https://server.gview.ca/>) (Petkau et al. 2010).

414 **List of abbreviations:**

415 Human gastrointestinal tract: GIT; coding DNA sequence: CDS; horizontal gene transfer:  
416 HGT; Comprehensive Antibiotic Resistance Database: CARD; Mobile genetic elements:  
417 MGEs; Insertion sequences: ISs; genomic island: GI; phosphotransferase system: PTS;  
418 exopolysaccharide: EPS; ultra-fast bacterial pan-genome analysis pipeline: BPGA; Virulence  
419 Factor of Bacterial Pathogens Database: VFDB

420 **DECLARATIONS**

421 **Consent for publication:** Not Applicable

422 **Ethics approval and consent to participate:** Not Applicable

423 **Availability of data and material:** Not Applicable

424 **Competing interests:** None

425 **Funding:** This work was supported by the Department of Biotechnology, Government of  
426 India, under Grant National Centre for Microbial Resources (NCMR)  
427 (BT/Coord.II/01/03/2016).

428 **Authors' contributions:** VG, DD, SP: Designed the concept; VG, MG, DD, YM: Execution  
429 of the concept; DD, SP: Guide to the concept, BM, OP, YS, YM: checking and intellectual  
430 inputs to the paper.

431 **Acknowledgements:** Additional financial support was provided by the Department of  
432 Biotechnology, Basaveshwar Engineering College, Bagalkot, under TEQUIP Grant to Bharati  
433 S. Meti.

434

435

436 **REFERENCES**

- 437 Abeijón MC, Medina RB, Katz MB, González SN. 2006. Technological properties of  
438 *Enterococcus faecium* isolated from ewe ' s milk and cheese with importance for flavour  
439 development. *Can J Microbiol* **52**: 237–245.
- 440 Ahmadova A, Todorov SD, Choiset Y, Rabesona H, Mirhadi Zadi T, Kuliyevev A, Franco  
441 BDG de M, Chobert JM, Haertlé T. 2013. Evaluation of antimicrobial activity, probiotic  
442 properties and safety of wild strain *Enterococcus faecium* AQ71 isolated from  
443 Azerbaijani Motal cheese. *Food Control* **30**: 631–641.  
444 <http://dx.doi.org/10.1016/j.foodcont.2012.08.009>.
- 445 Altschul SF, Gish W, Miller W, Myers EW, Lipman DJ. 1990. Basic local alignment search  
446 tool. *J Mol Biol* **215**: 403–410.  
447 <https://www.sciencedirect.com/science/article/pii/S0022283605803602?via%3Dihub>  
448 (Accessed March 26, 2018).
- 449 Araújo TF, Ferreira CL de LF. 2013. The genus *enterococcus* as probiotic: Safety concerns.  
450 *Brazilian Arch Biol Technol* **56**: 457–466.
- 451 Arndt D, Grant JR, Marcu A, Sajed T, Pon A, Liang Y, Wishart DS. 2016. PHASTER: a  
452 better, faster version of the PHAST phage search tool. *Nucleic Acids Res* **44**: W16–W21.
- 453 Backman J, Shackleton J, Kent V, Prell L, Hays JD, Denton N, Prentice M. 1983. Shiga-Like  
454 Toxin-Converting Phages from *Escherichia coli*. *Shiga-Like Toxin-Converting Phage*  
455 *from Escherichia coli Strains That Cause Hemorrhagic Colitis or Infant Diarrhea* **226**:  
456 694–696.
- 457 Bakshi U, Sarkar M, Paul S, Dutta C. 2016. Assessment of virulence potential of  
458 uncharacterized *Enterococcus faecalis* strains using pan genomic approach –

- 459 Identification of pathogen-specific and habitat-specific genes. *Sci Rep* **6**: 38648.  
460 <http://www.nature.com/articles/srep38648>.
- 461 Baldassarri L, Bertuccini L, Ammendolia MG, Gherardi G, Creti R. 2001. Variant esp gene  
462 in *Enterococcus faecium*. *Lancet* **357**: 1802.
- 463 Banwo K, Sanni A, Tan H. 2013. Technological properties and probiotic potential of  
464 *Enterococcus faecium* strains isolated from cow milk. *J Appl Microbiol* **114**: 229–241.
- 465 Begley M, Hill C, Gahan CGM. 2006. Bile Salt Hydrolase Activity in Probiotics Bile Salt  
466 Hydrolase Activity in Probiotics. *Appl Environ Microbiol* **72**: 1729–1738.
- 467 Bender JK, Fiedler S, Klare I, Werner G. 2015. Complete Genome Sequence of the Gut  
468 Commensal and Laboratory Strain *Enterococcus faecium* 64/3. *Genome Announc* **3**: 53–  
469 60.  
470 <http://www.ncbi.nlm.nih.gov/pubmed/26586871>  
471 <http://www.pubmedcentral.nih.gov/articlerender.fcgi?artid=PMC4653773>.
- 472 Benyacoub J, Perez PF, Rochat F, Saudan KY, Reuteler G, Antille N, Humen M, De Antoni  
473 GL, Cavadini C, Blum S, et al. 2005. *Enterococcus faecium* SF68 enhances the immune  
474 response to *Giardia intestinalis* in mice. *J Nutr* **135**: 1171–1176.  
475 [http://www.ncbi.nlm.nih.gov/entrez/query.fcgi?cmd=Retrieve&db=PubMed&dopt=Citation&list\\_uids=15867299](http://www.ncbi.nlm.nih.gov/entrez/query.fcgi?cmd=Retrieve&db=PubMed&dopt=Citation&list_uids=15867299).  
476
- 477 Beukers AG, Zaheer R, Goji N, Amoako KK, Chaves A V., Ward MP, McAllister TA. 2017.  
478 Comparative genomics of *Enterococcus* spp. isolated from bovine feces. *BMC Microbiol*  
479 **17**: 52. <http://bmcmicrobiol.biomedcentral.com/articles/10.1186/s12866-017-0962-1>.
- 480 Bonacina J, Suárez N, Hormigo R, Fadda S, Lechner M, Saavedra L. 2017. A genomic view  
481 of food-related and probiotic *Enterococcus* strains. *DNA Res* **24**: 11–24.

- 482 Byappanahalli MN, Nevers MB, Korajkic A, Staley ZR, Harwood VJ. 2012. Enterococci in  
483 the Environment. *Microbiol Mol Biol Rev* **76**: 685–706.  
484 <http://mmbbr.asm.org/cgi/doi/10.1128/MMBR.00023-12>.
- 485 Campos E, Campos E, Baldoma L, Baldoma L, Aguilar J, Aguilar J, Badia J, Badia J. 2004.  
486 Regulation of Expression of the Divergent. *Society* **186**: 1720–1728.
- 487 Charteris WP, Kelly PM, Morelli L, Collins JK. 1998. Development and application of an in  
488 vitro methodology to determine the transit tolerance of potentially probiotic  
489 Lactobacillus and Bifidobacterium species in the upper human gastrointestinal tract. *J*  
490 *Appl Microbiol* **84**: 759–768.
- 491 Chaudhari NM, Gupta VK, Dutta C. 2016. BPGA- an ultra-fast pan-genome analysis  
492 pipeline. *Sci Rep* **6**: 24373. <http://www.nature.com/articles/srep24373>.
- 493 Chen C, Zhang W, Zheng H, Lan R, Wang H, Du P, Bai X, Ji S, Meng Q. 2013. Minimum  
494 Core Genome Sequence Typing of Bacterial Pathogens : a. *J Clin Microbiol* **51**: 2582–  
495 2591.
- 496 Chen L, Yang J, Yu J, Yao Z, Sun L, Shen Y, Jin Q. 2005. VFDB: A reference database for  
497 bacterial virulence factors. *Nucleic Acids Res* **33**: 325–328.
- 498 Comerlato CB, de Resende MCC, Caierão J, d’Azevedo PA. 2013. Presence of virulence  
499 factors in Enterococcus faecalis and Enterococcus faecium susceptible and resistant to  
500 vancomycin. *Mem Inst Oswaldo Cruz* **108**: 590–595.
- 501 Coque TM, Willems RJL, Fortún J, Diz S, Loza E, Cantón R. 2005. Population Structure of  
502 Enterococcus faecium Causing Bacteremia in a Spanish University Hospital : Setting the  
503 Scene for a Future Increase in Vancomycin Resistance ? Population Structure of  
504 Enterococcus faecium Causing Bacteremia in a Spanish University H. *Antimicrob*

- 505 *Agents Chemother* **49**: 2693–2700.
- 506 Dahlén G, Blomqvist S, Almståhl A, Carlén A. 2012. Virulence factors and antibiotic  
507 susceptibility in enterococci isolated from oral mucosal and deep infections. *J Oral*  
508 *Microbiol* **4**: 1–7.
- 509 Davis BM, Waldor MK. 2003. Filamentous phages linked to virulence of *Vibrio cholerae*.  
510 *Curr Opin Microbiol* **6**: 35–42.
- 511 Devriese L a., Van De Kerckhove a., Kilpper-Balz R, Schleifer KH. 1987. Characterization  
512 and Identification of Enterococcus Species Isolated from the Intestines of Animals. *Int J*  
513 *Syst Bacteriol* **37**: 257–259.
- 514 Dhillon BK, Laird MR, Shay JA, Winsor GL, Lo R, Nizam F, Pereira SK, Waglechner N,  
515 McArthur AG, Langille MGI, et al. 2015. IslandViewer 3: More flexible, interactive  
516 genomic island discovery, visualization and analysis. *Nucleic Acids Res* **43**: W104–  
517 W108.
- 518 Dobrindt U, Hochhut B, Hentschel U, Hacker J. 2004. Genomic islands in pathogenic and  
519 environmental microorganisms. *Nat Rev Microbiol* **2**: 414–424.  
520 <http://www.nature.com/doi/10.1038/nrmicro884>.
- 521 dos Santos KMO, Vieira ADS, Salles HO, Oliveira J da S, Rocha CRC, Borges M de F,  
522 Bruno LM, Franco BDG de M, Todorov SD. 2015. Safety, beneficial and technological  
523 properties of *Enterococcus faecium* isolated from Brazilian cheeses. *Brazilian J*  
524 *Microbiol* **46**: 237–249.
- 525 Eck P, Friel J. 2013. Vitamins & Minerals Editorial. *Vitam Miner* **3**: 1–2.
- 526 Fao J, Working WHO, Report G, Guidelines D, London F. 2002. Guidelines for the

- 527 Evaluation of Probiotics in Food. 1–11.
- 528 Fijan S. 2014. Microorganisms with Claimed Probiotic Properties: An Overview of Recent  
529 Literature. *Int J Environ Res Public Heal Int J Environ Res Public Heal Int J Environ*  
530 *Res Public Heal* **11**: 4745–4767. [www.mdpi.com/journal/ijerph](http://www.mdpi.com/journal/ijerph) (Accessed November 3,  
531 2016).
- 532 Finlay BB. 1997. Common Themes in Microbial Pathogenicity Revisited. *Microbiol Mol Biol*  
533 *Rev* **61**: 136–169.
- 534 Food and Nutrition Board NRC. 1989. *Recommended Dietary Allowances*.
- 535 Franz CMAP, Stiles ME, Schleifer KH, Holzapfel WH. 2003. Enterococci in foods - A  
536 conundrum for food safety. *Int J Food Microbiol* **88**: 105–122.
- 537 FREEMAN VJ. 1951. Studies on the virulence of bacteriophage-infected strains of  
538 *Corynebacterium diphtheriae*. *J Bacteriol* **61**: 675–688.
- 539 Galimand M, Schmitt E, Panvert M, Douthwaite S, Mechulam Y, Courvalin P. 2011. Intrinsic  
540 resistance to aminoglycosides in *Enterococcus faecium* is conferred by the 16S rRNA m  
541 5 C1404-specific methyltransferase EfmM. *RNA* **17**: 251–262.
- 542 Ganguly NK, Bhattacharya SK, Sesikeran B, Nair GB, Ramakrishna BS, Sachdev HPS,  
543 Batish VK, Kanagasabapathy AS, Muthuswamy V, Kathuria SC, et al. 2011. ICMR-  
544 DBT Guidelines for evaluation of probiotics in food. *Indian J Med Res* **134**: 22–25.
- 545 Geldart K, Kaznessis YN. 2017. Characterization of class IIa bacteriocin resistance in  
546 *Enterococcus faecium*. *Antimicrob Agents Chemother* **61**: 1–17.
- 547 Ghattargi VC, Nimonkar YS, Burse SA, Davray D, Kumbhare S V. 2018. Genomic and  
548 physiological analyses of an indigenous strain , *Enterococcus faecium* 17OM39. *Funct*

- 549 *Integr Genomics*.
- 550 Giraffa G. 2002. Enterococci from foods. *FEMS Microbiol Rev* **26**: 163–171.
- 551 Gold HS. 2001. Vancomycin-Resistant Enterococci : Mechanisms and Clinical Observations.  
552 *Antimicrob Resist* **33**: 214–19.
- 553 Grissa I, Vergnaud G, Pourcel C. 2008. CRISPRcompar: a website to compare clustered  
554 regularly interspaced short palindromic repeats. *Nucleic Acids Res* **36**: 52–57.
- 555 Guggenbichler JP, Assadian O, Boeswald M, Kramer A. 2011. Incidence and clinical  
556 implication of nosocomial infections associated with implantable biomaterials -  
557 catheters, ventilator-associated pneumonia, urinary tract infections. *GMS Krankenhhyg*  
558 *Interdiszip* **6**: Doc18.  
559 [http://www.pubmedcentral.nih.gov/articlerender.fcgi?artid=3252661&tool=pmcentrez&](http://www.pubmedcentral.nih.gov/articlerender.fcgi?artid=3252661&tool=pmcentrez&rendertype=abstract)  
560 [rendertype=abstract](http://www.pubmedcentral.nih.gov/articlerender.fcgi?artid=3252661&tool=pmcentrez&rendertype=abstract).
- 561 Hassanzadazar H, Ehsani A, Mardani K. 2014. Antibacterial activity of Enterococcus  
562 faecium derived from Koopeh cheese against *Listeria monocytogenes* in probiotic ultra-  
563 filtrated cheese. *Vet Res Forum* **5**: 169–175. [http://www.urmia.ac.ir/vrf/Shared](http://www.urmia.ac.ir/vrf/SharedDocuments/pdf/vol-5%20no-3/169-175-1171.pdf)  
564 [Documents/pdf/vol-5 no-3/169-175-1171.pdf](http://www.urmia.ac.ir/vrf/SharedDocuments/pdf/vol-5%20no-3/169-175-1171.pdf).
- 565 Hegstad K, Mikalsen T, Coque TM, Werner G, Sundsfjord A. 2010a. Mobile genetic  
566 elements and their contribution to the emergence of antimicrobial resistant *Enterococcus*  
567 *faecalis* and *Enterococcus faecium*. *Clin Microbiol Infect* **16**: 541–554.
- 568 Hegstad K, Mikalsen T, Coque TM, Werner G, Sundsfjord A. 2010b. Mobile genetic  
569 elements and their contribution to the emergence of antimicrobial resistant *Enterococcus*  
570 *faecalis* and *Enterococcus faecium*. *Clin Microbiol Infect* **16**: 541–554.  
571 <http://dx.doi.org/10.1111/j.1469-0691.2010.03226.x>.



- 572 Heikens E, Bonten MJM, Willems RJL. 2007. Enterococcal surface protein esp is important  
573 for biofilm formation of *Enterococcus faecium* E1162. *J Bacteriol* **189**: 8233–8240.
- 574 Heydari H, Wee WY, Lokanathan N, Hari R, Yusoff AM. 2013. MabsBase : A  
575 *Mycobacterium abscessus* Genome and Annotation Database. *PLoS One* **8**: 2–6.
- 576 Hollenbeck BL, Rice LB. 2012. Intrinsic and acquired resistance mechanisms in  
577 *enterococcus*. *Virulence* **3**: 421–569.  
578 <http://www.tandfonline.com/doi/abs/10.4161/viru.21282>.
- 579 Homan WL, Tribe D, Poznanski S, Li M, Hogg G, Spalburg E, Embden JD a Van, Willems  
580 JL, Willems RJL. 2002. Multilocus Sequence Typing Scheme for *Enterococcus faecium*  
581 Multilocus Sequence Typing Scheme for *Enterococcus faecium*. *J Clin Microbiol* **40**:  
582 1963–71.
- 583 Huh JY, Lee WG, Lee K, Shin WS. 2004. Distribution of Insertion Sequences Associated  
584 with Tn 1546 -Like Elements among *Enterococcus faecium* Isolates from Patients in  
585 Korea Distribution of Insertion Sequences Associated with Tn 1546 -Like Elements  
586 among *Enterococcus faecium* Isolates from Patie. *J Clin Microbiol* **42**: 1897–1902.
- 587 Huys G, Botteldoorn N, Delvigne F, De Vuyst L, Heyndrickx M, Pot B, Dubois JJ, Daube G.  
588 2013. Microbial characterization of probiotics-Advisory report of the Working Group  
589 “8651 Probiotics” of the Belgian Superior Health Council (SHC). *Mol Nutr Food Res*  
590 **57**: 1479–1504.
- 591 İspirli H, Demirbaş F, Dertli E. 2015. Characterization of functional properties of  
592 *Enterococcus faecium* strains isolated from human gut. *Can J Microbiol* **61**: 1–10.  
593 <http://www.ncbi.nlm.nih.gov/pubmed/26485327>.
- 594 Jiang X, Ellabaan MMH, Charusanti P, Munck C, Blin K, Tong Y, Weber T, Sommer MOA,

- 595 Lee SY. 2017. Dissemination of antibiotic resistance genes from antibiotic producers to  
596 pathogens. *Nat Commun* **8**: 15784.  
597 <http://www.nature.com/doi/10.1038/ncomms15784>.
- 598 Jones B V., Begley M, Hill C, Gahan CGM, Marchesi JR. 2008. Functional and comparative  
599 metagenomic analysis of bile salt hydrolase activity in the human gut microbiome. *Proc*  
600 *Natl Acad Sci U S A* **105**: 13580–5.  
601 [http://www.pubmedcentral.nih.gov/articlerender.fcgi?artid=2533232&tool=pmcentrez&](http://www.pubmedcentral.nih.gov/articlerender.fcgi?artid=2533232&tool=pmcentrez&rendertype=abstract)  
602 [rendertype=abstract](http://www.pubmedcentral.nih.gov/articlerender.fcgi?artid=2533232&tool=pmcentrez&rendertype=abstract).
- 603 Jong-Hoon Lee, Donghun Shin, Bitnara Lee, Hyundong Lee, Inhyung Lee D-WJ. 2017.  
604 Genetic Diversity and Antibiotic Resistance of Enterococcus faecalis Isolates from  
605 Traditional Korean Fermented Soybean Foods. *J Microbiol Biotechnol* **27**: 916–924.
- 606 Juhas M, Van Der Meer JR, Gaillard M, Harding RM, Hood DW, Crook DW. 2009.  
607 Genomic islands: Tools of bacterial horizontal gene transfer and evolution. *FEMS*  
608 *Microbiol Rev* **33**: 376–393.
- 609 Kačániová M, Kmet' V, Čubon' J. 2006. Effect of Enterococcus faecium on the digestive tract  
610 of poultry as a probiotic. *Turkish J Vet Anim Sci* **30**: 291–298.
- 611 Kajihara T, Nakamura S, Iwanaga N, Oshima K, Takazono T, Miyazaki T, Izumikawa K,  
612 Yanagihara K, Kohno N, Kohno S. 2015. Clinical characteristics and risk factors of  
613 enterococcal infections in Nagasaki, Japan: a retrospective study. *BMC Infect Dis* **15**:  
614 426. <http://dx.doi.org/10.1186/s12879-015-1175-6>.
- 615 Kaplan T. 2014. The Role of Horizontal Gene Transfer in Antibiotic Resistance. *Eukaryon*  
616 **10**: 80–81.
- 617 King KY, Horenstein JA, Caparon MG. 2000. Aerotolerance and peroxide resistance in

- 618 peroxidase and PerR mutants of *Streptococcus pyogenes*. *J Bacteriol* **182**: 5290–5299.
- 619 Kirjavainen P V, Saxelin M, Rautelin H, Valtonen V, Salminen SJ, Ouwehand AC. 2001.
- 620 Good adhesion properties of probiotics : a potential risk for bacteremia ? *FEMS Immunol*
- 621 *Med Microbiol* **31**: 35–39.
- 622 Kopit LM, Kim EB, Siezen RJ, Harris LJ, Marco ML. 2014. Safety of the surrogate
- 623 microorganism *Enterococcus faecium* NRRL B-2354 for use in thermal process
- 624 validation. *Appl Environ Microbiol* **80**: 1899–1909.
- 625 Kreuzer S, MacHnowska P, Amus J, Sieber M, Pieper R, Schmidt MF, Brockmann GA,
- 626 Scharek-Tedin L, Johne R. 2012. Feeding of the probiotic bacterium *Enterococcus*
- 627 *faecium* NCIMB 10415 differentially affects shedding of enteric viruses in pigs. *Vet Res*
- 628 **43**: 1–12.
- 629 Lam MMC, Seemann T, Bulach DM, Gladman SL, Chen H, Haring V, Moore RJ, Ballard S,
- 630 Grayson ML, Johnson PDR, et al. 2012. Comparative analysis of the first complete
- 631 *Enterococcus faecium* genome. *J Bacteriol* **194**: 2334–2341.
- 632 Langille MGI, Brinkman FSL. 2009. IslandViewer: An integrated interface for computational
- 633 identification and visualization of genomic islands. *Bioinformatics* **25**: 664–665.
- 634 Li L, Stoeckert CJJ, Roos DS. 2003. OrthoMCL: Identification of Ortholog Groups for
- 635 Eukaryotic Genomes -- Li et al. 13 (9): 2178 -- Genome Research. *Genome Res* **13**:
- 636 2178–2189. <http://genome.cshlp.org/cgi/content/full/13/9/2178>.
- 637 López M, Sáenz Y, Álvarez-Martínez MJ, Marco F, Robredo B, Rojo-Bezares B, Ruiz-Larrea
- 638 F, Zarazaga M, Torres C. 2010. Tn1546 structures and multilocus sequence typing of
- 639 vanA-containing enterococci of animal, human and food origin. *J Antimicrob*
- 640 *Chemother* **65**: 1570–1575.

- 641 Mahmood L. 2014. The metabolic processes of folic acid and Vitamin B12 deficiency. *J Heal*  
642 *Res Rev* **1**: 5. <http://www.jhrr.org/text.asp?2014/1/1/5/143318>.
- 643 Manero A, Blanch AR. 1999. Identification of Enterococcus spp . with a Biochemical Key.  
644 *Appl Environ Microbiol* **65**: 4425–4430.
- 645 Marothi Y a, Agnihotri H, Dubey D. 2005. Enterococcal resistance: an overview. *Indian J*  
646 *Med Microbiol* **23**: 214–219.
- 647 Matos RC, Lapaque N, Rigottier-Gois L, Debarbieux L, Meylheuc T, Gonzalez-Zorn B,  
648 Repoila F, de Lopes MF, Serror P. 2013. Enterococcus faecalis Prophage Dynamics and  
649 Contributions to Pathogenic Traits. *PLoS Genet* **9**.
- 650 McArthur AG, Waglechner N, Nizam F, Yan A, Azad MA, Baylay AJ, Bhullar K, Canova  
651 MJ, De Pascale G, Ejim L, et al. 2013. The comprehensive antibiotic resistance  
652 database. *Antimicrob Agents Chemother* **57**: 3348–3357.
- 653 McBride SM, Coburn PS, Baghdayan AS, Willems RJL, Grande MJ, Shankar N, Gilmore  
654 MS. 2009. Genetic variation and evolution of the pathogenicity island of Enterococcus  
655 faecalis. *J Bacteriol* **191**: 3392–3402.
- 656 McKenney PT, Ling L, Wang G, Mane S, Pamer EG. 2016. Complete Genome Sequence of  
657 *Enterococcus faecium* ATCC 700221. *Genome Announc* **4**: e00386-16.  
658 <http://genomea.asm.org/lookup/doi/10.1128/genomeA.00386-16>.
- 659 Mikalsen T, Pedersen T, Willems R, Coque TM, Werner G, Sadowy E, van Schaik W, Jensen  
660 LB, Sundsfjord A, Hegstad K. 2015. Investigating the mobilome in clinically important  
661 lineages of Enterococcus faecium and Enterococcus faecalis. *BMC Genomics* **16**: 282.  
662 [http://www.pubmedcentral.nih.gov/articlerender.fcgi?artid=4438569&tool=pmcentrez&](http://www.pubmedcentral.nih.gov/articlerender.fcgi?artid=4438569&tool=pmcentrez&rendertype=abstract)  
663 [rendertype=abstract](http://www.pubmedcentral.nih.gov/articlerender.fcgi?artid=4438569&tool=pmcentrez&rendertype=abstract).

- 664 Miller WR, Munita JM, Arias CA. 2014. Mechanisms of antibiotic resistance in enterococci.  
665 *Expert Rev Anti Infect Ther* **12**: 1221–36.  
666 [http://www.pubmedcentral.nih.gov/articlerender.fcgi?artid=4433168&tool=pmcentrez&](http://www.pubmedcentral.nih.gov/articlerender.fcgi?artid=4433168&tool=pmcentrez&rendertype=abstract)  
667 [rendertype=abstract](http://www.pubmedcentral.nih.gov/articlerender.fcgi?artid=4433168&tool=pmcentrez&rendertype=abstract).
- 668 Minelli EB, Benini A. 2008. Relationship between number of bacteria and their probiotic  
669 effects. *Microb Ecol Health Dis* **20**: 180–183.
- 670 Monot M, Boursaux-Eude C, Thibonnier M, Vallenet D, Moszer I, Medigue C, Martin-  
671 Verstraete I, Dupuy B. 2011. Reannotation of the genome sequence of *Clostridium*  
672 *difficile* strain 630. *J Med Microbiol* **60**: 1193–1199.
- 673 Natarajan P, Parani M. 2015. First complete genome sequence of a probiotic enterococcus  
674 faecium strain t-110 and its comparative genome analysis with pathogenic and non-  
675 pathogenic enterococcus faecium genomes. *J Genet Genomics* **42**: 43–46.  
676 <http://dx.doi.org/10.1016/j.jgg.2014.07.002>.
- 677 O’Driscoll T, Crank CW. 2015. Vancomycin-resistant enterococcal infections:  
678 Epidemiology, clinical manifestations, and optimal management. *Infect Drug Resist* **8**:  
679 217–230.
- 680 Ohrvik VE, Witthoft CM. 2011. Human folate bioavailability. *Nutrients* **3**: 475–490.
- 681 Ouwehand AC, Kirjavainen P V, Shortt C, Salminen S. 1999. Probiotics : mechanisms and  
682 established effects. *Int Dairy J* **9**: 43–52.
- 683 Overbeek R, Olson R, Pusch GD, Olsen GJ, Davis JJ, Disz T, Edwards RA, Gerdes S,  
684 Parrello B, Shukla M, et al. 2014. The SEED and the Rapid Annotation of microbial  
685 genomes using Subsystems Technology (RAST). *Nucleic Acids Res* **42**: 206–214.

- 686 Palmer KL, Gilmore MS. 2010. Multidrug-resistant enterococci lack CRISPR-cas. *MBio* **1**:  
687 1–10.
- 688 Palmer KL, Godfrey P, Griggs A, Kos VN, Zucker J, Desjardins C, Cerqueira G, Gevers D,  
689 Walker S, Wortman J, et al. 2012. Comparative Genomics of Enterococci : Comparative  
690 Genomics of Enterococci : Variation in. *MBio* **3**: 1–11.
- 691 Parks DH, Tyson GW, Hugenholtz P, Beiko RG. 2014. STAMP: Statistical analysis of  
692 taxonomic and functional profiles. *Bioinformatics* **30**: 3123–3124.
- 693 Petkau A, Stuart-Edwards M, Stothard P, van Domselaar G. 2010. Interactive microbial  
694 genome visualization with GView. *Bioinformatics* **26**: 3125–3126.
- 695 Postma PW, Lengeler JW, Jacobson GR. 1993. Phosphoenolpyruvate: Carbohydrate  
696 phosphotransferase systems of bacteria. *Microbiol Rev* **57**: 543–594.  
697 [http://www.pubmedcentral.nih.gov/articlerender.fcgi?artid=372926&tool=pmcentrez&](http://www.pubmedcentral.nih.gov/articlerender.fcgi?artid=372926&tool=pmcentrez&rendertype=abstract)  
698 [endertype=abstract](http://www.pubmedcentral.nih.gov/articlerender.fcgi?artid=372926&tool=pmcentrez&rendertype=abstract).
- 699 Qin X, Galloway-Pêa JR, Sillanpaa J, Roh JH, Nallapareddy SR, Chowdhury S, Bourgoigne  
700 A, Choudhury T, Muzny DM, Buhay CJ, et al. 2012. Complete genome sequence of  
701 *Enterococcus faecium* strain TX16 and comparative genomic analysis of *Enterococcus*  
702 *faecium* genomes. *BMC Microbiol* **12**.
- 703 Ramadhan a a, Hegedus E. 2005. Biofilm formation and esp gene carriage in enterococci. *J*  
704 *Clin Pathol* **58**: 685–686.
- 705 Rao S, Ihara Y, Sukegawa S, Arakawa F, Fujimura T, Murakami H, Morimatsu F. 2013.  
706 Characterization of probiotic properties of *Enterococcus faecium* NHRD IHARA  
707 isolated from porcine feces. *Biosci Biotechnol Biochem* **77**: 1967–9.  
708 <http://www.ncbi.nlm.nih.gov/pubmed/24018679>.

- 709 Rasouli Pirouzian H, Hesari J, Farajnia S, Moghaddam M, Ghiassifar S. 2012. Effects of  
710 *Enterococcus faecalis* and *Enterococcus faecium*, isolated from traditional Lighvan  
711 cheese, on physicochemical and sensory characteristics of Iranian UF white cheese. *J*  
712 *Agric Sci Technol* **14**: 1023–1034.
- 713 Rehaïem A, Belgacem Z Ben, Edalatian MR, Mart??nez B, Rodr??guez A, Manai M, Guerra  
714 NP. 2014. Assessment of potential probiotic properties and multiple bacteriocin  
715 encoding-genes of the technological performing strain *Enterococcus faecium* MMRA.  
716 *Food Control* **37**: 343–350. <http://dx.doi.org/10.1016/j.foodcont.2013.09.044>.
- 717 Rosvoll TCS, Pedersen T, Sletvold H, Johnsen PJ, Sollid JE, Simonsen GS, Jensen LB,  
718 Nielsen KM, Sundsfjord A. 2010. PCR-based plasmid typing in *Enterococcus faecium*  
719 strains reveals widely distributed pRE25-, pRUM-, pIP501- and pHT $\beta$ -related replicons  
720 associated with glycopeptide resistance and stabilizing toxin-antitoxin systems. *FEMS*  
721 *Immunol Med Microbiol* **58**: 254–268.
- 722 Sangvik M, Littauer P, Simonsen GS, Sundsfjord A, Dahl KH. 2005. *mef*(A), *mef*(E) and a  
723 new *mef* allele in macrolide-resistant *Streptococcus* spp. isolates from Norway. *J*  
724 *Antimicrob Chemother* **56**: 841–846.
- 725 Sankarasubramanian J, Vishnu US, Gunasekaran P, Rajendhran J. 2016. A genome-wide  
726 SNP-based phylogenetic analysis distinguishes different biovars of *Brucella suis*. *Infect* ,  
727 *Genet Evol* **41**: 213–217. <http://dx.doi.org/10.1016/j.meegid.2016.04.012>.
- 728 Santagati M, Campanile F, Stefani S. 2012. Genomic diversification of enterococci in hosts:  
729 The role of the mobilome. *Front Microbiol* **3**: 1–9.
- 730 Satish Kumar R, Kanmani P, Yuvaraj N, Paari KA, Pattukumar V, Arul V. 2011. Purification  
731 and characterization of enterocin MC13 produced by a potential aquaculture probiont

- 732 *Enterococcus faecium* MC13 isolated from the gut of *Mugil cephalus*. *Can J Microbiol*  
733 **57**: 993–1001. <http://www.nrcresearchpress.com/doi/abs/10.1139/w11-092>.
- 734 Shankar N, Baghdayan a S, Gilmore MS. 2002. Modulation of virulence within a  
735 pathogenicity island in vancomycin- resistant *Enterococcus faecalis*. *Nature* **417**: 746–  
736 50. [http://www.ncbi.nlm.nih.gov/htbin-](http://www.ncbi.nlm.nih.gov/htbin-post/Entrez/query?db=m&form=6&dopt=r&uid=12066186)  
737 [post/Entrez/query?db=m&form=6&dopt=r&uid=12066186](http://www.ncbi.nlm.nih.gov/htbin-post/Entrez/query?db=m&form=6&dopt=r&uid=12066186).
- 738 Siguier P, Gourbeyre E, Chandler M. 2014. Bacterial insertion sequences: Their genomic  
739 impact and diversity. *FEMS Microbiol Rev* **38**: 865–891.
- 740 Siguier P, Perochon J, Lestrade L, Mahillon J, Chandler M. 2006. ISfinder: the reference  
741 centre for bacterial insertion sequences. *Nucleic Acids Res* **34**: D32-6.  
742 [http://www.pubmedcentral.nih.gov/articlerender.fcgi?artid=1347377&tool=pmcentrez&](http://www.pubmedcentral.nih.gov/articlerender.fcgi?artid=1347377&tool=pmcentrez&rendertype=abstract%5Cnhttp://www.ncbi.nlm.nih.gov/pubmed/16381877%5Cnhttp://www.pubmedcentral.nih.gov/articlerender.fcgi?artid=PMC1347377)  
743 [rendertype=abstract%5Cnhttp://www.ncbi.nlm.nih.gov/pubmed/16381877%5Cnhttp://w](http://www.pubmedcentral.nih.gov/articlerender.fcgi?artid=1347377&tool=pmcentrez&rendertype=abstract%5Cnhttp://www.ncbi.nlm.nih.gov/pubmed/16381877%5Cnhttp://www.pubmedcentral.nih.gov/articlerender.fcgi?artid=PMC1347377)  
744 [ww.pubmedcentral.nih.gov/articlerender.fcgi?artid=PMC1347377](http://www.pubmedcentral.nih.gov/articlerender.fcgi?artid=PMC1347377).
- 745 Stadler C, Teuber M. 2002. The macrolide efflux genetic assembly of *Streptococcus*  
746 *pneumoniae* is present in erythromycin-resistant *Streptococcus salivarius* [5].  
747 *Antimicrob Agents Chemother* **46**: 3690–3691.
- 748 Toledo-Arana A, Valle J, Solano C, Arrizubieta MJ, Cucarella C, Lamata M, Amorena B,  
749 Leiva J, Penades JR, Lasa I. 2001. The Enterococcal Surface Protein, Esp, Is Involved in  
750 *Enterococcus faecalis* Biofilm Formation. *Appl Environ Microbiol* **67**: 4538–4545.
- 751 Tong J, Lu XT, Zhang JY, Sui Q, Wang R, Chen M, Wei Y. 2017. Occurrence of antibiotic  
752 resistance genes and mobile genetic elements in enterococci and genomic DNA during  
753 anaerobic digestion of pharmaceutical waste sludge with different pretreatments.  
754 *Bioresour Technol* **235**: 316–324. <http://dx.doi.org/10.1016/j.biortech.2017.03.104>.



- 755 Tuszyńska M. 2012. Folic Acid - The Occurrence and the Role in Human Nutrition. *Veg*  
756 *Crop Res Bull* **76**: 43–54. <http://www.degruyter.com/view/j/vcrb.2012.76.issue-->  
757 [1/v10032-012-0003-4/v10032-012-0003-4.xml](http://www.degruyter.com/view/j/vcrb.2012.76.issue--1/v10032-012-0003-4/v10032-012-0003-4.xml).
- 758 Vahjen W, Männer K. 2003. The effect of a probiotic *Enterococcus faecium* product in diets  
759 of healthy dogs on bacteriological counts of *Salmonella* spp., *Campylobacter* spp. and  
760 *Clostridium* spp. in faeces. *Arch Anim Nutr* **57**: 229–233.
- 761 VanRenterghem B. 2012. 126th AOAC Annual Meeting & Exposition. *Food Saf Mag* 38–45.
- 762 Vliet AHM Van, Kusters JG. 2015. Use of Alignment-Free Phylogenetics for Rapid Genome  
763 Sequence- Based Typing of *Helicobacter pylori* Virulence Markers and Antibiotic. *J*  
764 *Clin Microbiol* **53**: 2877–2888.
- 765 Von Wintersdorff CJH, Penders J, Van Niekerk JM, Mills ND, Majumder S, Van Alphen LB,  
766 Savelkoul PHM, Wolffs PFG. 2016. Dissemination of antimicrobial resistance in  
767 microbial ecosystems through horizontal gene transfer. *Front Microbiol* **7**: 1–10.
- 768 Wang X, Tong H, Dong X. 2014. PerR-regulated manganese ion uptake contributes to  
769 oxidative stress defense in an oral streptococcus. *Appl Environ Microbiol* **80**: 2351–  
770 2359.
- 771 Werner G, Fleige C, Geringer U, van Schaik W, Klare I, Witte W. 2011. IS element IS16 as a  
772 molecular screening tool to identify hospital-associated strains of *Enterococcus faecium*.  
773 *BMC Infect Dis* **11**: 80. [http://bmcinfectdis.biomedcentral.com/articles/10.1186/1471-](http://bmcinfectdis.biomedcentral.com/articles/10.1186/1471-2334-11-80)  
774 [2334-11-80](http://bmcinfectdis.biomedcentral.com/articles/10.1186/1471-2334-11-80).
- 775 Wu S, Zhu Z, Fu L, Niu B, Li W, Yooseph S, Sutton G, Rusch D, Halpern A, Williamson S,  
776 et al. 2011. WebMGA: a customizable web server for fast metagenomic sequence  
777 analysis. *BMC Genomics* **12**: 444.

778 <http://bmcgenomics.biomedcentral.com/articles/10.1186/1471-2164-12-444> (Accessed  
779 October 14, 2016).

780 Xu L, He SS, Li DY, Mei C, Hou XL, Jiang LS, Liu FH. 2016. Hydrogen peroxide induces  
781 oxidative stress and the mitochondrial pathway of apoptosis in RAT intestinal epithelial  
782 cells (IEC-6). *Mol Biol* **50**: 270–277. <http://dx.doi.org/10.1134/S0026893316020266>.

783

| Features                       | Probiotic                 |                       | Non-Pathogenic    |                    |                 | Pathogenic      |                 |                            |                            |                      |
|--------------------------------|---------------------------|-----------------------|-------------------|--------------------|-----------------|-----------------|-----------------|----------------------------|----------------------------|----------------------|
|                                | T110                      | 17OM39                | NRRLB-2354        | 64/3               | DO              | Aus0004         | Aus0085         | 6E6                        | E39                        | ATCC 700221          |
| <b>Size (mb)</b>               | 2.6                       | 2.6                   | 2.6               | 2.5                | 2.6             | 2.9             | 2.9             | 2.9                        | 2.7                        | 2.8                  |
| <b>GC%</b>                     | 38.4                      | 38.5                  | 37.8              | 38.2               | 37.9            | 38.3            | 37.9            | 37.6                       | 37.8                       | 37.8                 |
| <b>Genes</b>                   | 2,639                     | 2,865                 | 2,771             | 2,508              | 2,795           | 2,960           | 3,214           | 3,404                      | 3,043                      | 3,145                |
| <b>CDS</b>                     | 2,502                     | 2,639                 | 2,658             | 2,418              | 2,703           | 2,825           | 2,938           | 3,307                      | 2,907                      | 2,725                |
| <b>Pseudo Genes</b>            | 54                        | 148                   | 47                | 32                 | 32              | 70              | 181             | 73                         | 44                         | 326                  |
| <b>rRNAs</b><br>(5S, 16S, 23S) | 6, 6, 6                   | 6, 6,6                | 6, 6, 6           | 6, 6, 6            | 6, 6, 6         | 6, 6, 6         | 6, 6, 6         | 6, 6, 6                    | 6, 6, 6                    | 6, 6, 6              |
| <b>tRNAs</b>                   | 65                        | 62                    | 48                | 68                 | 62              | 47              | 76              | 75                         | 70                         | 72                   |
| <b>Plasmid</b>                 | 1                         | -                     | 1                 | -                  | 3               | 3               | 6               | 2                          | 5                          | 3                    |
| <b>Accession code</b>          | NZ_<br>CP006030.1         | LWHF<br>00000000.1    | NC_<br>020207.1   | NZ_<br>CP012522.1  | NC_<br>017960.1 | NC_<br>017022.1 | NC_<br>021994.1 | NZ_<br>CP013994.1          | NZ_<br>CP011281.1          | CP<br>014449.1       |
| <b>Source</b>                  | probiotic                 | feces                 | cheese            | feces              | blood           | blood           | blood           | feces                      | blood                      | feces                |
| <b>Country</b>                 | Japan                     | India                 | -                 | Germany            | USA             | Australia       | Australia       | USA                        | USA                        | USA                  |
| <b>Reference</b>               | Natarajan and Parani 2015 | Ghattargi et al. 2018 | Kopit et al. 2014 | Bender et al. 2015 | Lam et al. 2012 | Qin et al. 2012 | Qin et al. 2012 | Geldart and Kaznessis 2017 | Geldart and Kaznessis 2017 | McKenney et al. 2016 |

3

4 **Table 2** Antibiotic Resistance genes found in *Enterococcus* genomes as performed by CARD analysis, where + Present and - Absent

5

6

| Antibiotics  | T110 | 17OM39 | NRRL B-2354 | 64_3 | DO | Aus0004 | Aus0085 | 6_E6 | E39 | ATCC 700221 |
|--------------|------|--------|-------------|------|----|---------|---------|------|-----|-------------|
| Daptomycin   | -    | -      | -           | -    | -  | -       | -       | -    | +   | -           |
| Trimethoprim | -    | -      | -           | -    | -  | +       | +       | +    | +   | -           |
| Multidrug    | -    | -      | -           | -    | -  | +       | -       | -    | -   | -           |
| Macrolide    | -    | -      | -           | -    | -  | +       | -       | -    | -   | -           |
| Polymyxin    | -    | -      | -           | -    | -  | -       | -       | -    | -   | +           |
| Tetracycline | -    | -      | -           | -    | -  | +       | +       | +    | +   | -           |
| Vancomycin   | -    | -      | -           | -    | -  | +       | +       | -    | -   | -           |

7

8

9

10

11 **Table 3** Virulence factors found in *Enterococcus* genomes, where + Present; - Absent; \* Non-functional due to presence of stop

12 codon.

13

| CATEGORY          | GENES         | T110 | 17OM39 | NRRL B-<br>2354 | 64/3 | DO | Aus004 | Aus0085 | 6E6 | E39 | ATCC<br>700221 |
|-------------------|---------------|------|--------|-----------------|------|----|--------|---------|-----|-----|----------------|
| <b>Adherence</b>  | <i>acm</i>    | *    | *      | *               | *    | +  | +      | +       | +   | +   | +              |
|                   | <i>EbpA</i>   | -    | -      | +               | +    | +  | +      | +       | +   | +   | +              |
|                   | <i>EbpC</i>   | -    | -      | +               | +    | +  | +      | +       | +   | +   | +              |
|                   | <i>srtC</i>   | +    | +      | +               | +    | +  | +      | +       | +   | +   | +              |
|                   | <i>EcbA</i>   | -    | -      | -               | -    | +  | +      | +       | +   | +   | +              |
|                   | <i>efaA</i>   | +    | +      | +               | +    | +  | +      | +       | +   | +   | +              |
|                   | <i>Esp</i>    | -    | -      | -               | -    | -  | +      | +       | +   | +   | +              |
|                   | <i>Scm</i>    | *    | *      | *               | *    | +  | +      | +       | +   | +   | +              |
|                   | <i>SgrA</i>   | -    | -      | -               | -    | +  | +      | +       | +   | +   | +              |
| <b>Bioflim</b>    | <i>bopD</i>   | *    | *      | *               | *    | +  | +      | +       | +   | +   | +              |
| <b>Exoenzymes</b> | <i>EF0818</i> | +    | *      | -               | -    | -  | -      | -       | -   | -   | -              |

14

15

17 **Table 4** Number of genes responsible for survival in GI track within *Enterococcus* genomes.

| CATEGORY            | GENES                                                                             | T110 | 17OM39 | NRRL B-2354 | 64/3 | DO  | Aus0004 | Aus0085 | 6_E6 | E39 | ATCC 700221 |
|---------------------|-----------------------------------------------------------------------------------|------|--------|-------------|------|-----|---------|---------|------|-----|-------------|
| Acid resistance     | <i>LBA0995</i><br><i>LBA1524</i><br><i>LBA1272</i><br><i>gadC</i><br><i>rrp-1</i> | 3/5  | 3/5    | 3/5         | 3/5  | 4/5 | 4/5     | 5/5     | 4/5  | 4/5 | 3/5         |
| Bile resistance     | <i>LBA1430</i><br><i>clpE</i><br><i>dps</i><br><i>LBA1429</i>                     | 4/4  | 4/4    | 4/4         | 4/4  | 4/4 | 4/4     | 4/4     | 4/4  | 4/4 | 4/4         |
| Competitive         | <i>copA</i><br><i>met</i><br><i>pts14C</i>                                        | 3/3  | 3/3    | 2/3         | 2/3  | 2/3 | 2/3     | 2/3     | 2/3  | 2/3 | 2/3         |
| Adherence           | <i>lsp</i><br><i>FbpA</i><br><i>ispA</i>                                          | 2/3  | 2/3    | 3/3         | 3/3  | 3/3 | 3/3     | 3/3     | 3/3  | 3/3 | 3/3         |
| Persistence         | <i>LJ1656</i><br><i>msrB</i><br><i>LJ1654</i><br><i>clpC</i>                      | 4/4  | 4/4    | 4/4         | 4/4  | 4/4 | 4/4     | 4/4     | 4/4  | 4/4 | 4/4         |
| Bile salt hydrolase | <i>bsh</i>                                                                        | 1/1  | 1/1    | 1/1         | 1/1  | 1/1 | 1/1     | 1/1     | 1/1  | 1/1 | 1/1         |
| Growth              | <i>treC</i>                                                                       | 1/1  | 1/1    | 1/1         | 1/1  | 1/1 | 1/1     | 1/1     | 1/1  | 1/1 | 1/1         |
| Adaptation          | <i>Lr1265</i><br><i>Lr1584</i>                                                    | 1/2  | 1/2    | 1/2         | 1/2  | 1/2 | 2/2     | 2/2     | 2/2  | 2/2 | 2/2         |

19

20 **Table 5** Probiotic properties found in *Enterococcus* genomes, where + Present and - Absent

| Properties            | 17OM39                        | T110                | 64/3 | NRRL<br>B-2354 | DO | Aus0004 | Aus0085 | 6_E6 | E39 | ATCC<br>700221 |
|-----------------------|-------------------------------|---------------------|------|----------------|----|---------|---------|------|-----|----------------|
| <b>Anti-oxidant</b>   | +                             | +                   | -    | -              | -  | -       | -       | -    | -   | -              |
| <b>Anti-bacterial</b> | +                             | +                   | -    | -              | -  | -       | -       | -    | -   | -              |
| <b>EPS</b>            | +                             | +                   | +    | +              | -  | -       | -       | -    | -   | -              |
| <b>Amino-acid</b>     | valine, lysine,<br>methionine | valine,<br>lysine   | -    | -              | -  | -       | -       | -    | -   | -              |
| <b>Vitamins</b>       | Folate,<br>Thiamine           | Folate,<br>Thiamine | -    | -              | -  | -       | -       | -    | -   | -              |

21

22

1 **FIGURES**

2

3

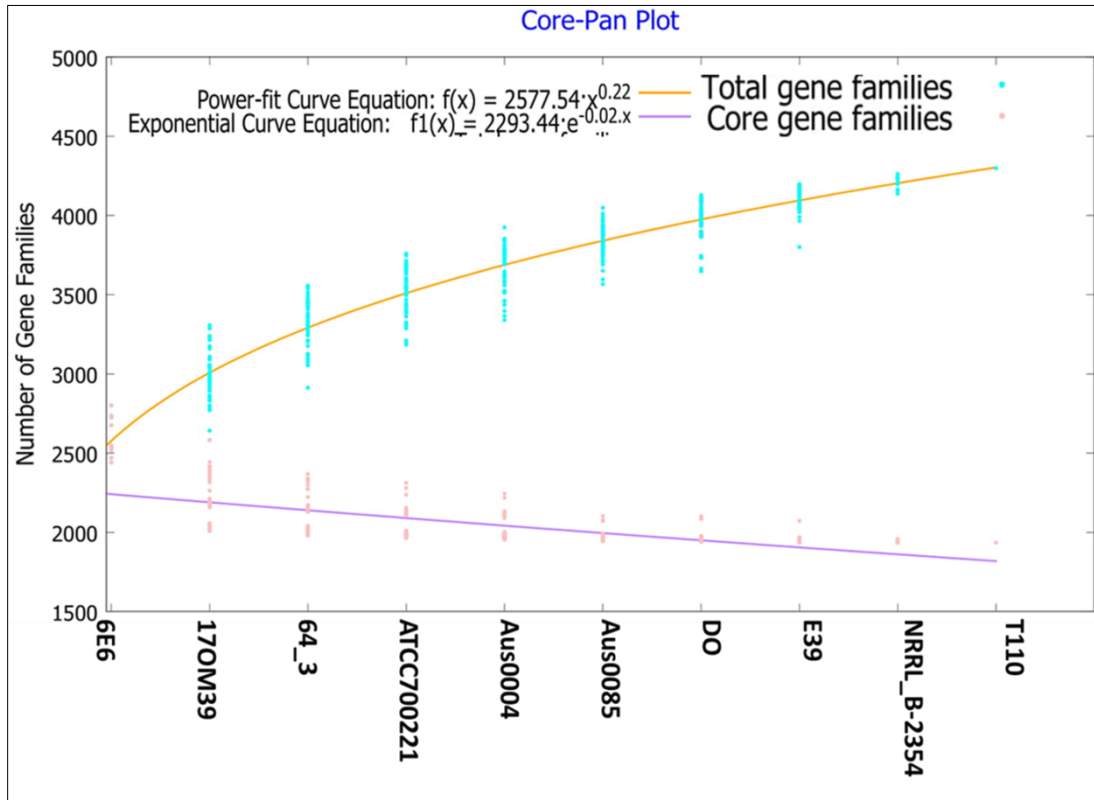

4

5 **Figure 1** Core and pan genome for *E. faecium* strains. The number of shared genes is plotted as  
6 the function of number of strains (n) added sequentially. 1935 genes are shared by all 10  
7 genomes. The orange line represents the least-squares fit to the power law function  $f(x)=a \cdot x^b$   
8 where  $a = 2577.54$ ,  $b = 0.222602$ . The red line represents the least-squares fit to the exponential  
9 decay function  $f_1(x)=c \cdot e^{(d \cdot x)}$  where  $c = 2293.44$ ,  $d = -0.0232013$ .

10

11



12

13

14

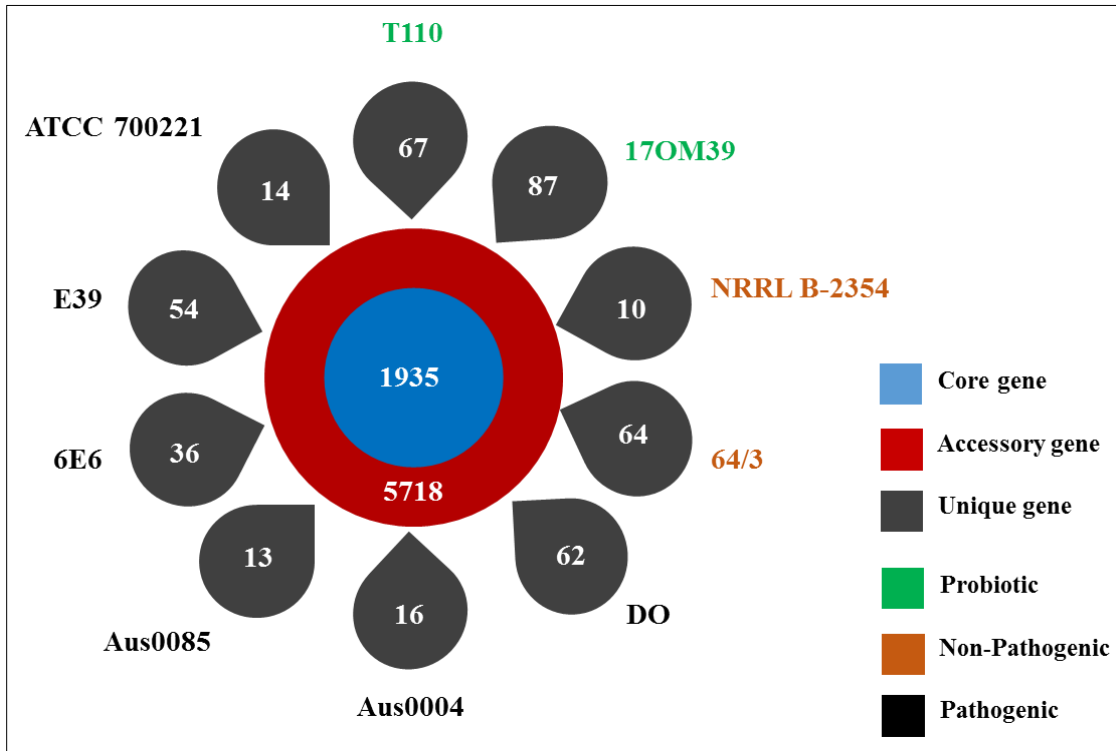

15

16 **Figure 2** Number of Core, Accessory and Unique gene families of *Enterococcus* genomes. The  
17 inner circle represents the core genome consisting of 1935 genes in single copy. The outer red  
18 circle represents the accessory genome for all then ten strains adding to a sum of 5718 genes,  
19 while the outer petals represents the unique genes associated with all the strains. The strains  
20 green coloured are probiotics, brown are non-pathogenic and the black are pathogenic.

21

22

23

24

25

26

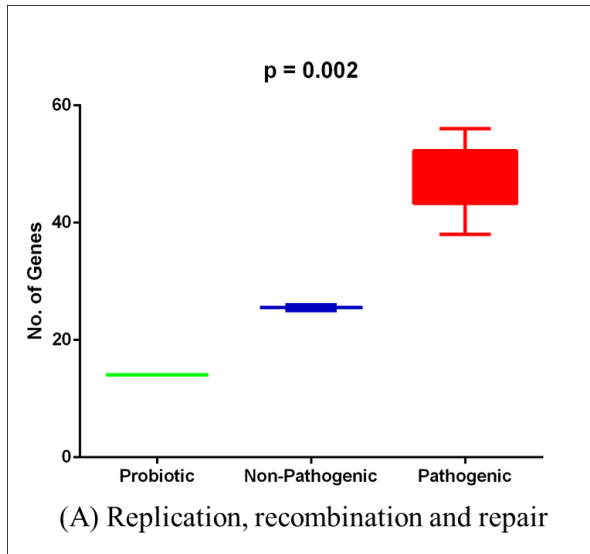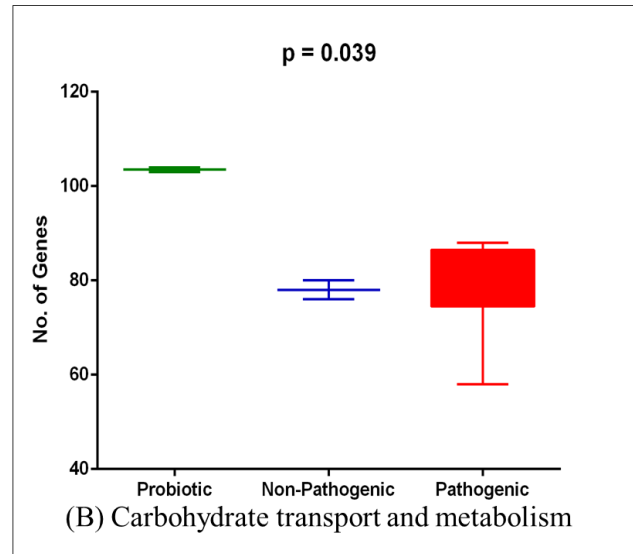

27

28

29 **Figure 3** Showing the Significant COG's in the accession genome. (A) Replication,  
30 recombination and repair (B) Carbohydrate transport and metabolism

31

32

33

34

35

36

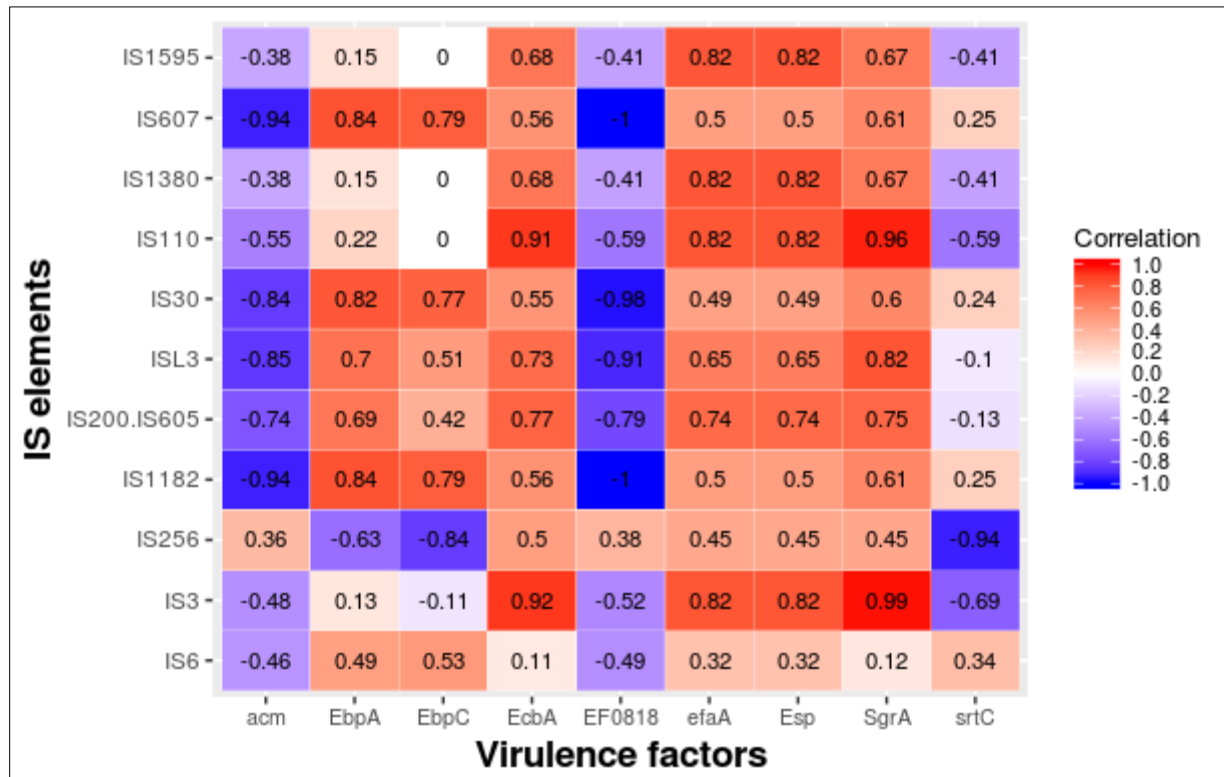

38

39 **Figure 4** The heat map showing the correlation between the IS elements and virulence factors  
 40 found across the genome. Red color indicated the strong positive correlation while the blue  
 41 indicates negative correlation.

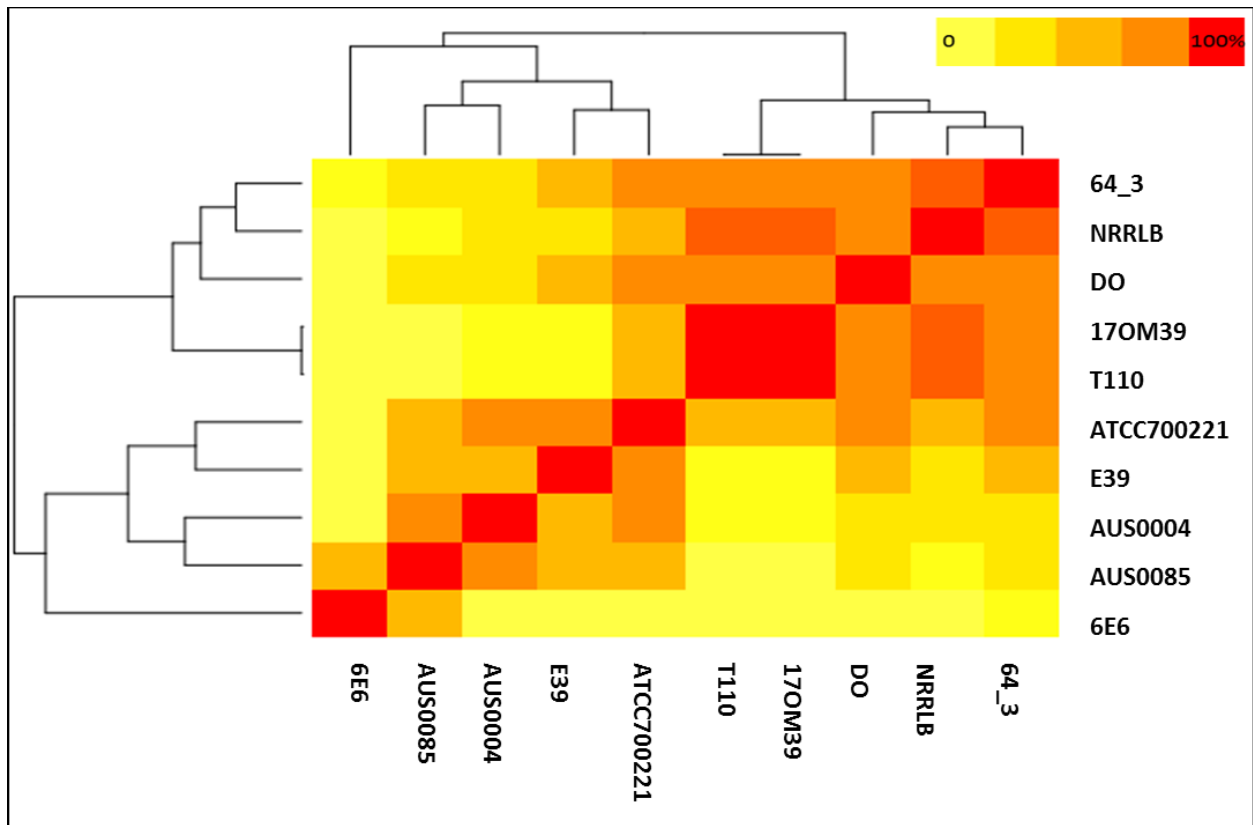

42

43

44 **Figure 5** Heat map showing the similarities between the Genomic Islands of the strains  
 45 considered in this study. The lightyellow shows least percent similarity while the red indicate  
 46 100% similarity with the genomes of the strains considered in the study. The pathogenic strains  
 47 (E39, Aus0004, Aus0085 and 6E6) shows clustering while the probiotic strains (T110 &  
 48 17OM39), nonpathogenic strains (64\_3 & NRRLB) and pathogenic strain DO present another  
 49 clustering. The color scheme is as shown in the top right corner.

50

51

52

53

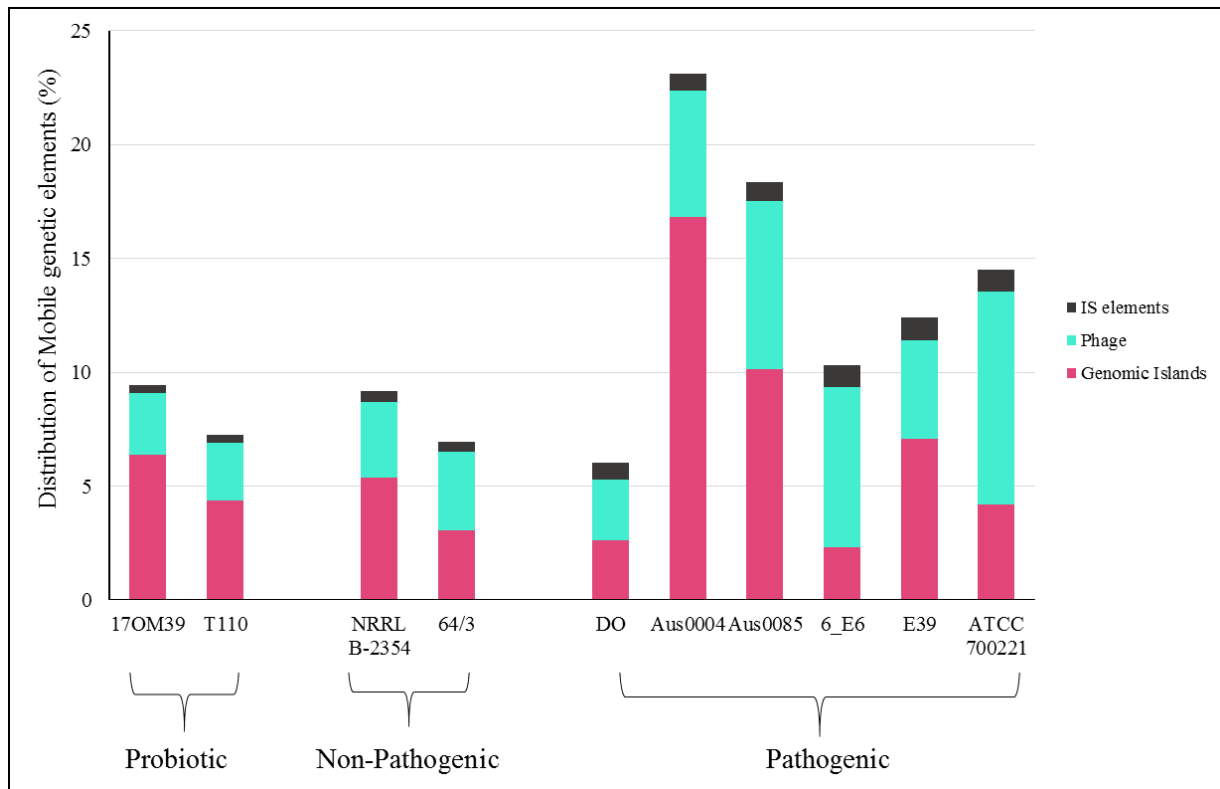

54

55

56 **Figure 6** Proportion of Mobile Genetic Elements across *Enterococcus* genomes. The pick colour  
 57 shows the proportion of genomic islands present in the each strain, light green for bacteriophages  
 58 and black of IS elements across all the strains. Strain AUS004 has nearly quarter of its genome  
 59 packed with these mobile genetic elements.

60

61

62

63

64

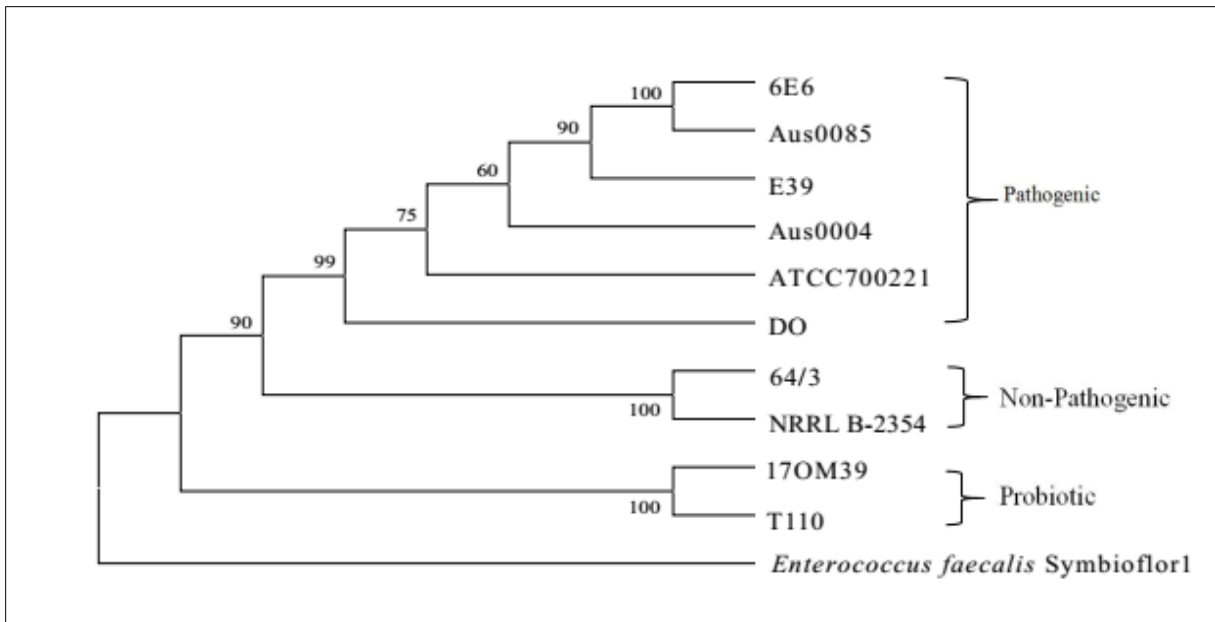

65

66

67 **Figure 7** Core Genome Phylogeny. Phylogenetic tree of 10 *Enterococcus faecium* strains using  
 68 the Maximum Likelihood method based on the GTR + G substitution model. The tree with the  
 69 highest log likelihood (-17644.1414) is shown. Evolutionary analyses were conducted in  
 70 MEGA6. A concatenated tree of 1945 genes was considered in the final dataset.

71

72

73

74

75

76

77

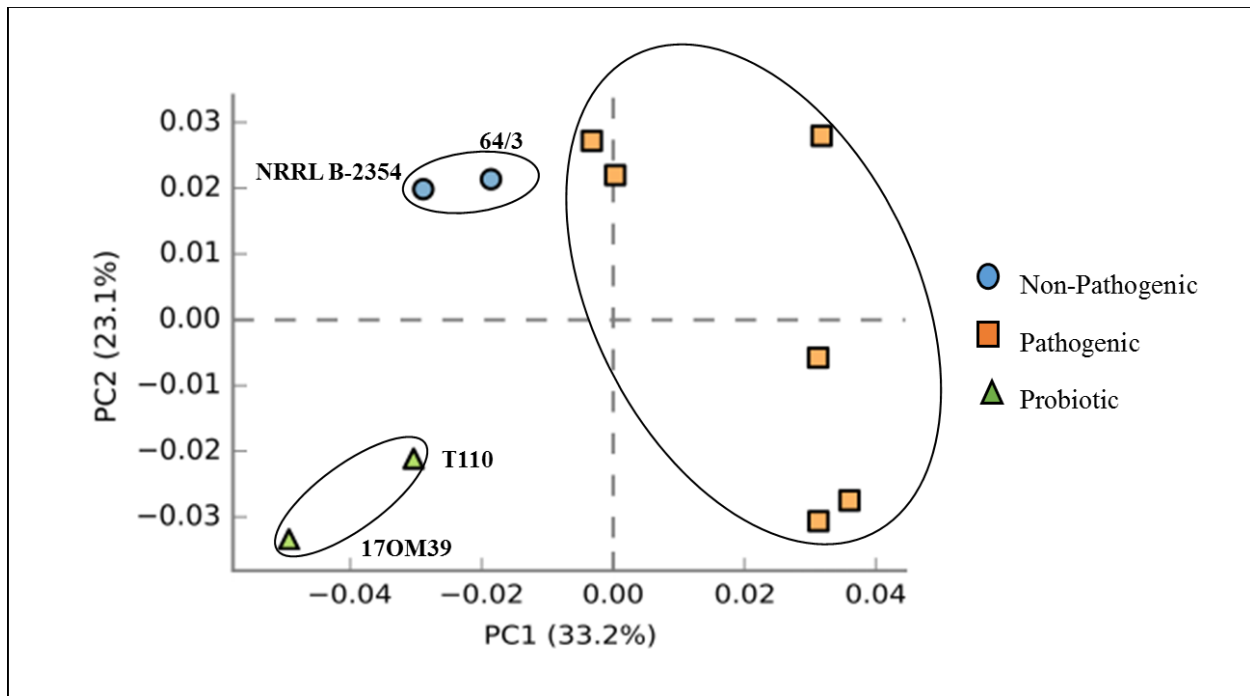

78

79

80 **Figure 8** PCA plot comparing probiotic, pathogenic and non-pathogenic *Enterococcus* genomes  
 81 based on presence and absence of genes responsible for survival in GI track, virulence factors  
 82 and antibiotic resistance. The probiotic strains are shown in green, non-pathogenic in blue and  
 83 pathogenic in red colour and the clustering is indicated by the oval shaped rings on the strains.  
 84 From the plot, it can be noted that strain 17OM39 is different from the marketed probiotic strain  
 85 T110.

86

87

88

89

90

91

92

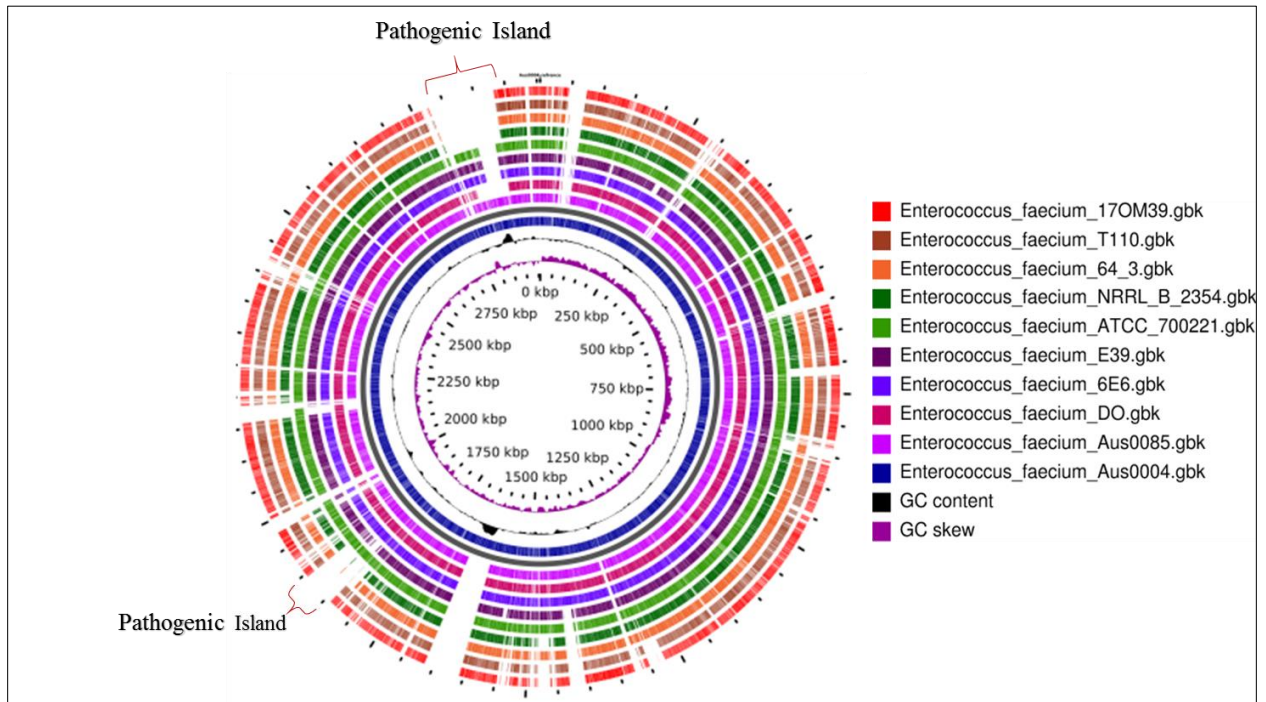

93

94

95 **Figure 9** Blast Atlas of *Enterococcus* genomes, with strain Aus004 as a reference genome  
96 followed by Aus0085, DO, 6E\_6, E\_39, ATCC\_7200221, NRRLB\_2354, 64\_3, T110 and the  
97 outermost as 17OM39. The two pathogenic islands (has most of virulence factors and antibiotic  
98 resistance genes) are shown in figure.

99



1 SUPPLEMENTARY MATERIAL

2 FIGURES

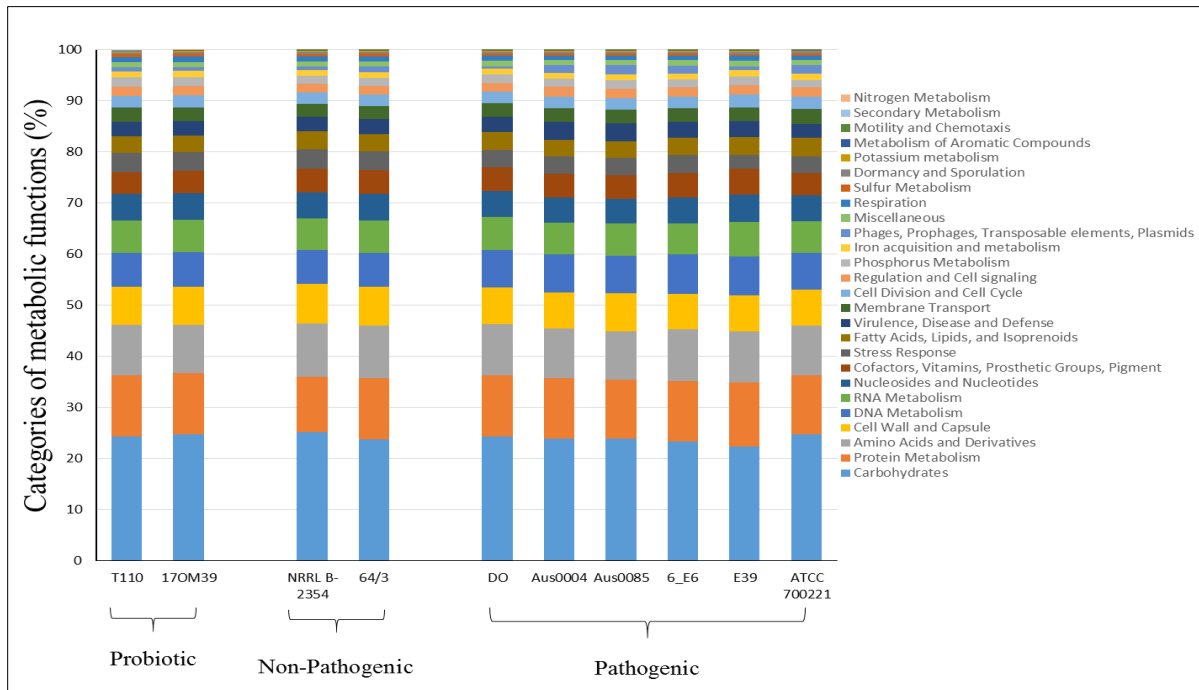

4 **Fig S1.** Features assigned to subsystems from RAST present in all ten *Enterococcus* strains.

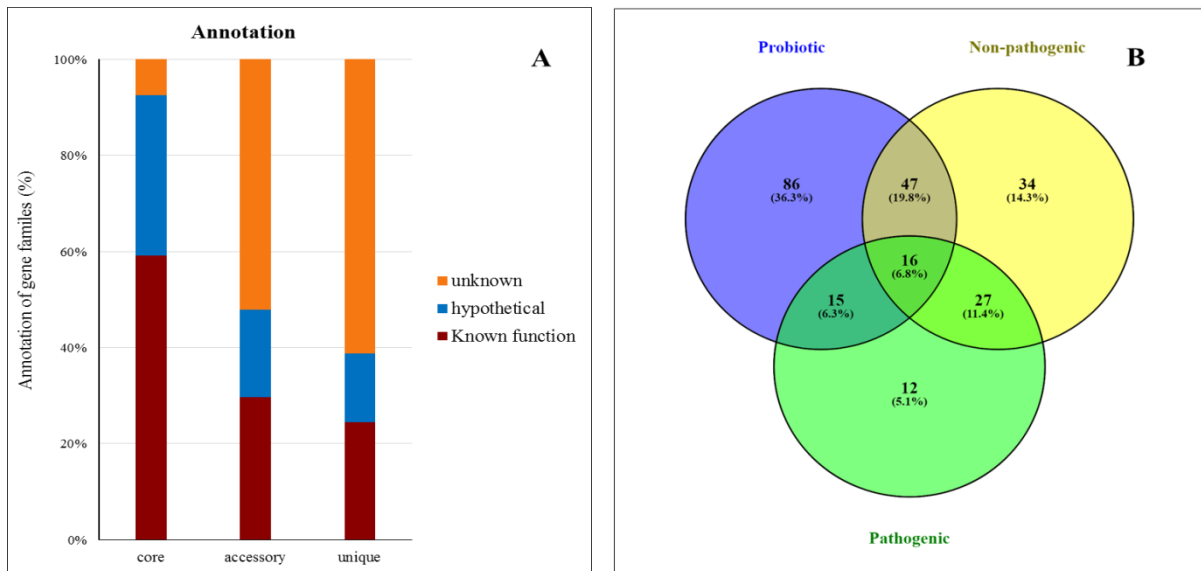

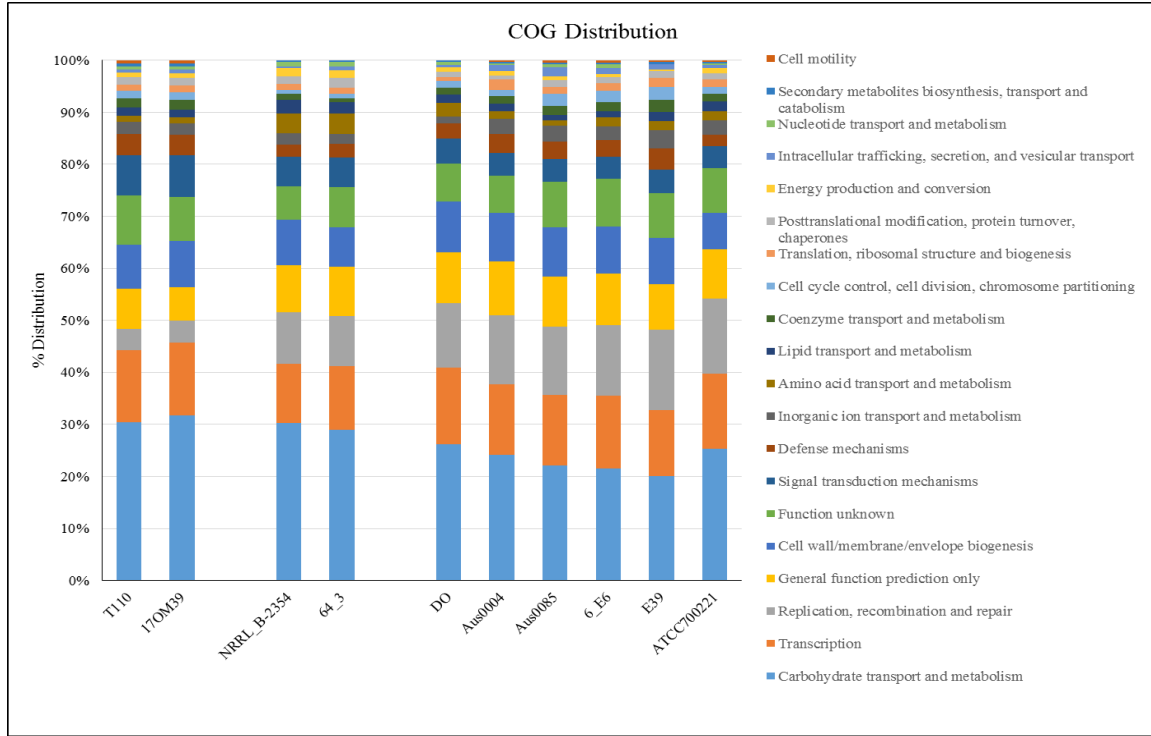

10

11 **Figure S3** Functional analysis of the accessory genes in COG categories

12

## 13 TABLES

| IS elements | Probiotic | Non-Pathogenic | Pathogenic |
|-------------|-----------|----------------|------------|
| IS1216      | -         | +              | +          |
| IS1216E     | -         | +              | +          |
| IS1216V     | -         | +              | +          |
| IS1251      | -         | +              | +          |
| IS1476      | -         | -              | +          |
| IS1485      | +         | +              | +          |
| IS1542      | +         | -              | -          |
| IS16        | -         | -              | +          |
| IS1678      | -         | -              | +          |
| IS19        | +         | +              | +          |
| IS256       | -         | -              | +          |
| IS6770      | -         | +              | +          |
| ISEf1       | -         | -              | +          |
| ISEfa10     | -         | +              | +          |
| ISEfa11     | -         | -              | +          |
| ISEfa12     | -         | +              | -          |
| ISEfa13     | -         | -              | +          |
| ISEfa4      | -         | -              | +          |
| ISEfa5      | -         | -              | +          |
| ISEfa7      | -         | -              | +          |
| ISEfa8      | -         | -              | +          |
| ISEfm1      | +         | +              | +          |
| ISEfm2      | +         | -              | +          |
| ISEnfa110   | -         | -              | +          |
| ISEnfa3     | -         | -              | +          |
| ISEnfa4     | +         | -              | +          |
| ISLgar5     | +         | -              | +          |
| ISS1W       | -         | +              | +          |
| ISSsu5      | -         | -              | +          |

14

15 **Table S1** IS elements found in *Enterococcus* genomes by ISfinder tool. + Present, - Absent

| Phage           | NRRL   |       |        |       |       |         |         |        |        | ATCC   |
|-----------------|--------|-------|--------|-------|-------|---------|---------|--------|--------|--------|
|                 | 17OM39 | T110  | B-2354 | 64/3  | DO    | Aus0004 | Aus0085 | 6_E6   | E39    | 700221 |
| Intact          | 1      | 2     | 2      | 2     | 1     | 3       | 3       | 3      | 2      | 4      |
| Questionable    | 1      | -     | -      | -     | 1     | 1       | 1       | 1      | 2      | 2      |
| Incomplete      | -      | -     | -      | -     | 1     | 1       | 1       | -      | -      | -      |
| Total Size (bp) | 73100  | 68700 | 87000  | 89100 | 74500 | 164900  | 220600  | 208400 | 117000 | 268300 |

17

18 **Table S2** Number of Phage elements present in *Enterococcus* genomes as intact, questionable  
19 and incomplete.

20

| Genome      | Genomic Islands | Size (bp) |
|-------------|-----------------|-----------|
| 17OM39      | 11              | 172279    |
| T110        | 9               | 117774    |
| NRRL B-2354 | 12              | 142123    |
| 64/3        | 7               | 78409     |
| DO          | 7               | 73539     |
| Aus0004     | 35              | 496552    |
| Aus0085     | 24              | 304164    |
| 6_E6        | 8               | 69233     |
| E39         | 17              | 191228    |
| ATCC 700221 | 10              | 119456    |

21 **Table S3** Number of Genomic Islands in *Enterococcus* genomes

22

23

24

25

| <b>Genes</b>           | <b>6_E6</b> | <b>ATCC_700221</b> | <b>Aus0085</b> | <b>DO</b> | <b>E39</b> |
|------------------------|-------------|--------------------|----------------|-----------|------------|
| <b>Aminoglycoside</b>  | +           | +                  | +              | +         | +          |
| <b>Chloramphenicol</b> | -           | -                  | -              | +         | -          |
| <b>Dihydrofolate</b>   | -           | +                  | -              | -         | -          |
| <b>Erythromycin</b>    | +           | +                  | +              | +         | +          |
| <b>Gentamicin</b>      | +           | +                  | -              | -         | -          |
| <b>Lincosamide</b>     | -           | -                  | +              | -         | -          |
| <b>Streptothricin</b>  | -           | +                  | -              | +         | +          |
| <b>Tetracycline</b>    | -           | -                  | -              | +         | -          |
| <b>Vancomycin</b>      | +           | +                  | -              | -         | +          |

26

27 **Table S4** Antibiotic Resistance genes found in *Enterococcus* plasmids as performed by CARD

28 analysis, where + Present and - Absent

29

30

31

32

33

34

35

36

37

| IS elements | 6_E6 | ATCC 700221 | Aus 0004 | Aus 0085 | DO | E39 | NRRLB 2354 | T110 |
|-------------|------|-------------|----------|----------|----|-----|------------|------|
| IS1062      | -    | -           | -        | -        | +  | -   | -          | -    |
| IS1182      | -    | +           | -        | -        | +  | +   | -          | -    |
| IS1216      | +    | +           | -        | +        | +  | +   | +          | -    |
| IS1216E     | +    | +           | -        | +        | +  | +   | +          | -    |
| IS1216V     | +    | +           | -        | +        | +  | +   | +          | -    |
| IS1251      | -    | +           | -        | -        | -  | +   | +          | -    |
| IS1297      | +    | -           | -        | +        | +  | +   | +          | -    |
| IS1476      | -    | +           | -        | -        | +  | -   | -          | -    |
| IS1485      | +    | +           | -        | +        | +  | +   | +          | -    |
| IS16        | +    | -           | -        | -        | +  | -   | -          | -    |
| IS19        | +    | +           | -        | +        | +  | +   | +          | -    |
| IS256       | +    | +           | -        | +        | -  | +   | +          | -    |
| IS6770      | -    | +           | -        | -        | +  | -   | -          | -    |
| ISCco2      | +    | +           | -        | +        | +  | +   | -          | -    |
| ISEf1       | +    | +           | -        | +        | +  | +   | +          | -    |
| ISEfa10     | +    | +           | -        | -        | -  | +   | -          | -    |
| ISEfa11     | +    | +           | -        | -        | +  | +   | +          | -    |
| ISEfa12     | -    | -           | -        | -        | +  | -   | -          | -    |
| ISEfa13     | +    | -           | -        | -        | -  | -   | -          | -    |
| ISEfa4      | +    | -           | +        | +        | +  | +   | -          | -    |
| ISEfa5      | +    | +           | -        | -        | +  | +   | +          | -    |
| ISEfa7      | +    | +           | -        | +        | +  | +   | -          | -    |
| ISEfa8      | +    | +           | -        | +        | +  | +   | -          | -    |
| ISEfm1      | +    | +           | -        | +        | +  | +   | +          | -    |
| ISEfm2      | +    | +           | -        | -        | +  | +   | -          | -    |
| ISEnfa3     | -    | -           | -        | +        | -  | -   | -          | -    |
| ISEnfa4     | +    | +           | -        | +        | -  | +   | +          | -    |
| ISLgar5     | +    | -           | -        | +        | -  | -   | -          | -    |
| ISLpl1      | -    | -           | -        | -        | -  | -   | +          | -    |
| ISPP1       | -    | -           | -        | -        | -  | -   | +          | -    |
| ISS1CH      | +    | -           | -        | +        | +  | +   | +          | -    |
| ISS1D       | +    | -           | -        | +        | +  | +   | +          | -    |
| ISS1E       | +    | -           | -        | +        | +  | +   | +          | -    |
| ISS1M       | +    | -           | -        | +        | +  | +   | +          | -    |
| ISS1N       | +    | -           | -        | +        | +  | +   | +          | -    |
| ISS1W       | +    | +           | -        | +        | +  | +   | +          | -    |

38

39 **Table S5** IS elements found in *Enterococcus* plasmids by ISfinder tool. + Present, - Absent

40
